# Supplementary material for: Boron monoxide dimer as a building block for boroxine based buckyballs and related cages: a theoretical study
Source: Royal Society of Chemistry journal article supplement (doi:10.1039/c6cc09489a), 2017-01-01
Supplement: c6cc09489a1.pdf [file c6cc09489a1.pdf]

# **Boron Monoxide Dimer as a Building Block for Boroxine Based Buckyballs and Related Cages: A Theoretical Study**

Yang Liu,<sup>a</sup> Chencheng Liu,<sup>a</sup> Liang Pu,<sup>a</sup> Zhong Zhang,<sup>\*a</sup> R. Bruce King<sup>\*b</sup>

<sup>a</sup> College of Science, Northwest A&F University, Yangling, Shanxi 712100, P. R. China, E-mail: zhangzhong6@126.com

<sup>b</sup> Department of Chemistry and Center for Computational Chemistry, University of Georgia, Athens, Georgia 30602, USA, E-mail: rbking@uga.edu

**Theoretical Method:**

**Floppy Energy Surfaces:**

**Table S1-S15:** Theoretical Cartesian coordinates for all compounds.

## Theoretical Method:

The computations were performed using the popular B3LYP method, which is a hybrid HF/DFT method combining the three-parameter Becke functional (B3) with the Lee-Yang-Parr (LYP) generalized gradient correlation functional.<sup>1,2</sup> All computations were performed using double- $\zeta$  plus polarization (DZP) basis sets. The DZP basis sets used for boron and oxygen add one set of pure spherical harmonic d functions with orbital exponents  $\alpha_d(\text{B}) = 0.70$  and  $\alpha_d(\text{O}) = 0.85$  to the standard Huzinaga-Dunning contracted DZ sets.<sup>3,4,5</sup>

The geometries of all structures were fully optimized using the B3LYP/DZP method. Vibrational frequencies were determined by evaluating analytically the second derivatives of the energy with respect to the nuclear coordinates. All of the computations were carried out with the Gaussian 09 program,<sup>6</sup> exercising the fine grid option (75 radial shells, 302 angular points) for evaluating integrals numerically,<sup>7</sup> while the tight ( $10^{-8}$  hartree) designation is the default for the self-consistent field (SCF) convergence. The reported free energies ( $\Delta G$ ) were obtained by applying zero point energy corrections to the initially obtained  $\Delta H$  values. An analytical frequency calculation was carried out for the polymer **c-B<sub>30</sub>**. However, the basis sets are too larger for the larger polymers for such frequency calculations.

## Floppy Energy Surfaces:

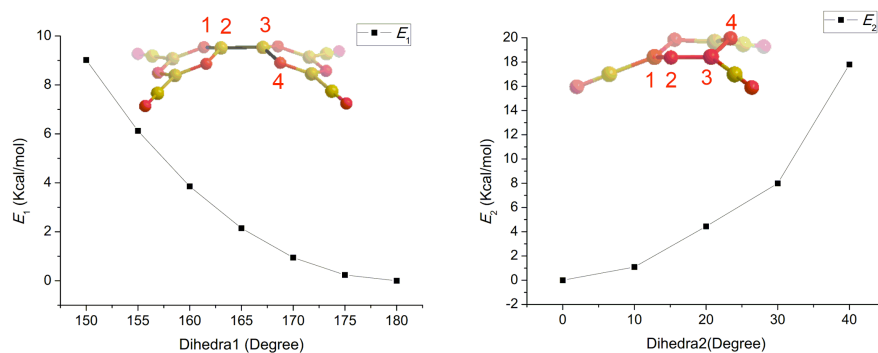

**Figure S2.** Potential energy surfaces around two  $B_3O_3$  rings and in a single  $B_3O_3$  ring.

The intrinsically rippled graphene<sup>8</sup> leads to low-dimensional materials, such as nanotubes, by coupling reactive boundary carbon atoms.<sup>9</sup> In our earlier reported largest planar  $(B_2O_2)_{84}$  structure<sup>10</sup>, 34 vibrational frequencies less than  $50\text{ cm}^{-1}$  in all were found for the bending around  $B_3O_3$  rings or in a single  $B_3O_3$  ring, suggesting the wrinkled surface of planar polymers. Furthermore, the energy surfaces around the OBBO dihedral angle in  $(B_2O_2)_5$  and the BOBO dihedral angle in  $(B_2O_2)_6$  are predicted in Figure S2. The data indicate that bending the OBBO or BOBO dihedral angle by  $20^\circ$  only increases the electronic energies by less than 4 kcal/mol. This is the direct indication of a wrinkled surface in the planar  $(B_2O_2)_x$  polymers.

**Table S1:** Theoretical Cartesian coordinates for  $c\text{-B}_6$ .  
Standard orientation:

| Center<br>Number | Atomic<br>Number | Atomic<br>Type | Coordinates (Angstroms) |           |           |
|------------------|------------------|----------------|-------------------------|-----------|-----------|
|                  |                  |                | X                       | Y         | Z         |
| 1                | 5                | 0              | -0.617658               | -0.617658 | 2.276000  |
| 2                | 5                | 0              | 0.617658                | 0.617658  | 2.276000  |
| 3                | 5                | 0              | 0.617658                | 2.276000  | 0.617658  |
| 4                | 5                | 0              | -0.617658               | 2.276000  | -0.617658 |
| 5                | 5                | 0              | -0.617658               | 0.617658  | -2.276000 |
| 6                | 5                | 0              | 0.617658                | -0.617658 | -2.276000 |
| 7                | 5                | 0              | 2.276000                | -0.617658 | -0.617658 |
| 8                | 5                | 0              | 2.276000                | 0.617658  | 0.617658  |
| 9                | 5                | 0              | -2.276000               | 0.617658  | -0.617658 |
| 10               | 5                | 0              | -2.276000               | -0.617658 | 0.617658  |
| 11               | 5                | 0              | -0.617658               | -2.276000 | 0.617658  |
| 12               | 5                | 0              | 0.617658                | -2.276000 | -0.617658 |
| 13               | 8                | 0              | 1.887989                | -1.887989 | -0.203296 |
| 14               | 8                | 0              | 0.203296                | -1.887989 | -1.887989 |
| 15               | 8                | 0              | 1.887989                | -0.203296 | -1.887989 |
| 16               | 8                | 0              | -1.887989               | 1.887989  | -0.203296 |
| 17               | 8                | 0              | -0.203296               | 1.887989  | -1.887989 |
| 18               | 8                | 0              | -1.887989               | 0.203296  | -1.887989 |
| 19               | 8                | 0              | 1.887989                | 0.203296  | 1.887989  |
| 20               | 8                | 0              | 0.203296                | 1.887989  | 1.887989  |
| 21               | 8                | 0              | 1.887989                | 1.887989  | 0.203296  |
| 22               | 8                | 0              | -1.887989               | -0.203296 | 1.887989  |
| 23               | 8                | 0              | -1.887989               | -1.887989 | 0.203296  |
| 24               | 8                | 0              | -0.203296               | -1.887989 | 1.887989  |

SCF Done: E(RB3LYP) = -1202.03625749

**Table S2:** Theoretical Cartesian coordinates for *c*-**B<sub>9</sub>**.  
Standard orientation:

| Center<br>Number | Atomic<br>Number | Atomic<br>Type | Coordinates (Angstroms) |           |           |
|------------------|------------------|----------------|-------------------------|-----------|-----------|
|                  |                  |                | X                       | Y         | Z         |
| 1                | 5                | 0              | 0.000000                | 2.752562  | 0.865004  |
| 2                | 5                | 0              | 0.000000                | 2.752562  | -0.865004 |
| 3                | 5                | 0              | -2.383789               | -1.376281 | 0.865004  |
| 4                | 5                | 0              | -2.383789               | -1.376281 | -0.865004 |
| 5                | 5                | 0              | 2.383789                | -1.376281 | 0.865004  |
| 6                | 5                | 0              | 2.383789                | -1.376281 | -0.865004 |
| 7                | 5                | 0              | -2.038253               | 0.171245  | 2.651612  |
| 8                | 5                | 0              | -1.167429               | 1.679556  | 2.651612  |
| 9                | 5                | 0              | 2.038253                | 0.171245  | 2.651612  |
| 10               | 5                | 0              | 1.167429                | 1.679556  | 2.651612  |
| 11               | 5                | 0              | 0.870824                | -1.850801 | 2.651612  |
| 12               | 5                | 0              | -0.870824               | -1.850801 | 2.651612  |
| 13               | 5                | 0              | -0.870824               | -1.850801 | -2.651612 |
| 14               | 5                | 0              | 0.870824                | -1.850801 | -2.651612 |
| 15               | 5                | 0              | 2.038253                | 0.171245  | -2.651612 |
| 16               | 5                | 0              | 1.167429                | 1.679556  | -2.651612 |
| 17               | 5                | 0              | -1.167429               | 1.679556  | -2.651612 |
| 18               | 5                | 0              | -2.038253               | 0.171245  | -2.651612 |
| 19               | 8                | 0              | -2.748688               | -0.207527 | 1.522517  |
| 20               | 8                | 0              | -1.554068               | -2.276670 | 1.522517  |
| 21               | 8                | 0              | -1.442259               | -0.832689 | 3.403167  |
| 22               | 8                | 0              | 1.554068                | -2.276670 | 1.522517  |
| 23               | 8                | 0              | 1.442259                | -0.832689 | 3.403167  |
| 24               | 8                | 0              | 2.748688                | -0.207527 | 1.522517  |
| 25               | 8                | 0              | -1.194620               | 2.484197  | 1.522517  |
| 26               | 8                | 0              | 0.000000                | 1.665377  | 3.403167  |
| 27               | 8                | 0              | 1.194620                | 2.484197  | 1.522517  |
| 28               | 8                | 0              | -1.194620               | 2.484197  | -1.522517 |
| 29               | 8                | 0              | 1.194620                | 2.484197  | -1.522517 |
| 30               | 8                | 0              | 0.000000                | 1.665377  | -3.403167 |
| 31               | 8                | 0              | 2.748688                | -0.207527 | -1.522517 |
| 32               | 8                | 0              | 1.554068                | -2.276670 | -1.522517 |
| 33               | 8                | 0              | 1.442259                | -0.832689 | -3.403167 |
| 34               | 8                | 0              | -2.748688               | -0.207527 | -1.522517 |
| 35               | 8                | 0              | -1.442259               | -0.832689 | -3.403167 |
| 36               | 8                | 0              | -1.554068               | -2.276670 | -1.522517 |

SCF Done: E(RB3LYP)= -1803.19584768

**Table S3:** Theoretical Cartesian coordinates for *c*-**B**<sub>12</sub>.

Standard orientation:

| Center<br>Number | Atomic<br>Number | Atomic<br>Type | Coordinates (Angstroms) |           |           |
|------------------|------------------|----------------|-------------------------|-----------|-----------|
|                  |                  |                | X                       | Y         | Z         |
| 1                | 5                | 0              | -2.557417               | -0.865756 | 2.557250  |
| 2                | 5                | 0              | -2.557417               | 0.865756  | 2.557250  |
| 3                | 5                | 0              | -2.557250               | 2.557417  | 0.865756  |
| 4                | 5                | 0              | -0.865756               | 2.557250  | 2.557417  |
| 5                | 5                | 0              | -2.557250               | -2.557417 | 0.865756  |
| 6                | 5                | 0              | -2.557250               | -2.557417 | -0.865756 |
| 7                | 5                | 0              | -0.865756               | -2.557250 | 2.557417  |
| 8                | 5                | 0              | 0.865756                | -2.557250 | 2.557417  |
| 9                | 5                | 0              | 2.557417                | -0.865756 | 2.557250  |
| 10               | 5                | 0              | 2.557417                | 0.865756  | 2.557250  |
| 11               | 5                | 0              | 0.865756                | 2.557250  | 2.557417  |
| 12               | 5                | 0              | 2.557250                | 2.557417  | 0.865756  |
| 13               | 5                | 0              | 2.557250                | 2.557417  | -0.865756 |
| 14               | 5                | 0              | 2.557250                | -2.557417 | 0.865756  |
| 15               | 5                | 0              | 2.557250                | -2.557417 | -0.865756 |
| 16               | 5                | 0              | 0.865756                | -2.557250 | -2.557417 |
| 17               | 5                | 0              | 2.557417                | -0.865756 | -2.557250 |
| 18               | 5                | 0              | -2.557417               | -0.865756 | -2.557250 |
| 19               | 5                | 0              | -2.557417               | 0.865756  | -2.557250 |
| 20               | 5                | 0              | -0.865756               | 2.557250  | -2.557417 |
| 21               | 5                | 0              | 0.865756                | 2.557250  | -2.557417 |
| 22               | 5                | 0              | 2.557417                | 0.865756  | -2.557250 |
| 23               | 8                | 0              | -3.204062               | -1.520312 | 1.521184  |
| 24               | 8                | 0              | -1.521184               | -3.204062 | 1.520312  |
| 25               | 8                | 0              | -1.520312               | -1.521184 | 3.204062  |
| 26               | 8                | 0              | 1.520312                | -1.521184 | 3.204062  |
| 27               | 8                | 0              | 3.204062                | 1.520312  | 1.521184  |
| 28               | 8                | 0              | 1.520312                | 1.521184  | 3.204062  |
| 29               | 8                | 0              | -1.520312               | 1.521184  | 3.204062  |
| 30               | 8                | 0              | 1.521184                | 3.204062  | 1.520312  |
| 31               | 8                | 0              | -3.204062               | 1.520312  | 1.521184  |
| 32               | 8                | 0              | -1.521184               | 3.204062  | 1.520312  |
| 33               | 8                | 0              | -3.204062               | 1.520312  | -1.521184 |
| 34               | 8                | 0              | -1.521184               | 3.204062  | -1.520312 |
| 35               | 8                | 0              | -1.520312               | 1.521184  | -3.204062 |
| 36               | 8                | 0              | -3.204062               | -1.520312 | -1.521184 |
| 37               | 8                | 0              | -1.521184               | -3.204062 | -1.520312 |
| 38               | 8                | 0              | -1.520312               | -1.521184 | -3.204062 |
| 39               | 8                | 0              | 1.520312                | -1.521184 | -3.204062 |
| 40               | 8                | 0              | 1.521184                | -3.204062 | -1.520312 |
| 41               | 8                | 0              | 3.204062                | -1.520312 | -1.521184 |
| 42               | 8                | 0              | 1.521184                | -3.204062 | 1.520312  |
| 43               | 8                | 0              | 3.204062                | -1.520312 | 1.521184  |
| 44               | 8                | 0              | 1.521184                | 3.204062  | -1.520312 |
| 45               | 8                | 0              | 3.204062                | 1.520312  | -1.521184 |
| 46               | 8                | 0              | 1.520312                | 1.521184  | -3.204062 |
| 47               | 5                | 0              | -0.865756               | -2.557250 | -2.557417 |
| 48               | 5                | 0              | -2.557250               | 2.557417  | -0.865756 |

SCF Done: E(RB3LYP) = -2404.39165428

**Table S4:** Theoretical Cartesian coordinates for *c*-**B**<sub>15</sub>.

Standard orientation:

| Center Number | Atomic Number | Atomic Type | Coordinates (Angstroms) |           |           |
|---------------|---------------|-------------|-------------------------|-----------|-----------|
|               |               |             | X                       | Y         | Z         |
| 1             | 5             | 0           | 0.000000                | 4.403407  | 0.865971  |
| 2             | 5             | 0           | 0.000000                | 4.403407  | -0.865971 |
| 3             | 5             | 0           | -4.187889               | 1.360728  | 0.865971  |
| 4             | 5             | 0           | -4.187889               | 1.360728  | -0.865971 |
| 5             | 5             | 0           | -2.588258               | -3.562431 | 0.865971  |
| 6             | 5             | 0           | -2.588258               | -3.562431 | -0.865971 |
| 7             | 5             | 0           | 2.588258                | -3.562431 | 0.865971  |
| 8             | 5             | 0           | 2.588258                | -3.562431 | -0.865971 |
| 9             | 5             | 0           | 4.187889                | 1.360728  | 0.865971  |
| 10            | 5             | 0           | 4.187889                | 1.360728  | -0.865971 |
| 11            | 5             | 0           | -0.864625               | -3.238506 | -2.488483 |
| 12            | 5             | 0           | 0.864625                | -3.238506 | -2.488483 |
| 13            | 5             | 0           | 1.204050                | 3.128220  | -2.488483 |
| 14            | 5             | 0           | 2.603042                | 2.111793  | -2.488483 |
| 15            | 5             | 0           | -1.204050               | 3.128220  | -2.488483 |
| 16            | 5             | 0           | -2.603042               | 2.111793  | -2.488483 |
| 17            | 5             | 0           | -3.347186               | -0.178446 | -2.488483 |
| 18            | 5             | 0           | -2.812818               | -1.823060 | -2.488483 |
| 19            | 5             | 0           | 2.812818                | -1.823060 | -2.488483 |
| 20            | 5             | 0           | 3.347186                | -0.178446 | -2.488483 |
| 21            | 5             | 0           | -1.204050               | 3.128220  | 2.488483  |
| 22            | 5             | 0           | -2.603042               | 2.111793  | 2.488483  |
| 23            | 5             | 0           | 1.204050                | 3.128220  | 2.488483  |
| 24            | 5             | 0           | 2.603042                | 2.111793  | 2.488483  |
| 25            | 5             | 0           | 3.347186                | -0.178446 | 2.488483  |
| 26            | 5             | 0           | 2.812818                | -1.823060 | 2.488483  |
| 27            | 5             | 0           | 0.864625                | -3.238506 | 2.488483  |
| 28            | 5             | 0           | -0.864625               | -3.238506 | 2.488483  |
| 29            | 5             | 0           | -2.812818               | -1.823060 | 2.488483  |
| 30            | 5             | 0           | -3.347186               | -0.178446 | 2.488483  |
| 31            | 8             | 0           | -1.604083               | -2.207831 | -3.049933 |
| 32            | 8             | 0           | -3.381725               | -2.638471 | -1.522660 |
| 33            | 8             | 0           | -1.464324               | -4.031544 | -1.522660 |
| 34            | 8             | 0           | 3.381725                | -2.638471 | -1.522660 |
| 35            | 8             | 0           | 1.604083                | -2.207831 | -3.049933 |
| 36            | 8             | 0           | 1.464324                | -4.031544 | -1.522660 |
| 37            | 8             | 0           | 3.554345                | 2.400879  | -1.522660 |
| 38            | 8             | 0           | 4.286727                | 0.146840  | -1.522660 |
| 39            | 8             | 0           | 2.595461                | 0.843316  | -3.049933 |
| 40            | 8             | 0           | -2.595461               | 0.843316  | -3.049933 |
| 41            | 8             | 0           | -3.554345               | 2.400879  | -1.522660 |
| 42            | 8             | 0           | -4.286727               | 0.146840  | -1.522660 |
| 43            | 8             | 0           | 1.185019                | 4.122296  | -1.522660 |
| 44            | 8             | 0           | -1.185019               | 4.122296  | -1.522660 |
| 45            | 8             | 0           | 0.000000                | 2.729029  | -3.049933 |
| 46            | 8             | 0           | 2.595461                | 0.843316  | 3.049933  |
| 47            | 8             | 0           | 4.286727                | 0.146840  | 1.522660  |
| 48            | 8             | 0           | 3.554345                | 2.400879  | 1.522660  |
| 49            | 8             | 0           | 0.000000                | 2.729029  | 3.049933  |
| 50            | 8             | 0           | -1.185019               | 4.122296  | 1.522660  |
| 51            | 8             | 0           | 1.185019                | 4.122296  | 1.522660  |

|    |   |   |           |           |          |
|----|---|---|-----------|-----------|----------|
| 52 | 8 | 0 | -2.595461 | 0.843316  | 3.049933 |
| 53 | 8 | 0 | -4.286727 | 0.146840  | 1.522660 |
| 54 | 8 | 0 | -3.554345 | 2.400879  | 1.522660 |
| 55 | 8 | 0 | -1.604083 | -2.207831 | 3.049933 |
| 56 | 8 | 0 | -1.464324 | -4.031544 | 1.522660 |
| 57 | 8 | 0 | -3.381725 | -2.638471 | 1.522660 |
| 58 | 8 | 0 | 3.381725  | -2.638471 | 1.522660 |
| 59 | 8 | 0 | 1.464324  | -4.031544 | 1.522660 |
| 60 | 8 | 0 | 1.604083  | -2.207831 | 3.049933 |

---

SCF Done: E(RB3LYP) = -3005.53814743



**Table S5:** Theoretical Cartesian coordinates for *c*-**B<sub>18</sub>**.

Standard orientation:

| Center Number | Atomic Number | Atomic Type | Coordinates (Angstroms) |           |           |
|---------------|---------------|-------------|-------------------------|-----------|-----------|
|               |               |             | X                       | Y         | Z         |
| 1             | 5             | 0           | 0.000000                | 5.137205  | 0.865965  |
| 2             | 5             | 0           | 0.000000                | 5.137205  | -0.865965 |
| 3             | 5             | 0           | 4.448950                | 2.568603  | 0.865965  |
| 4             | 5             | 0           | 4.448950                | 2.568603  | -0.865965 |
| 5             | 5             | 0           | -4.448950               | 2.568603  | 0.865965  |
| 6             | 5             | 0           | -4.448950               | 2.568603  | -0.865965 |
| 7             | 5             | 0           | 4.448950                | -2.568603 | 0.865965  |
| 8             | 5             | 0           | 4.448950                | -2.568603 | -0.865965 |
| 9             | 5             | 0           | -4.448950               | -2.568603 | 0.865965  |
| 10            | 5             | 0           | -4.448950               | -2.568603 | -0.865965 |
| 11            | 5             | 0           | 0.000000                | -5.137205 | 0.865965  |
| 12            | 5             | 0           | 0.000000                | -5.137205 | -0.865965 |
| 13            | 5             | 0           | 3.912669                | 0.865849  | 2.451123  |
| 14            | 5             | 0           | 3.912669                | -0.865849 | 2.451123  |
| 15            | 5             | 0           | 2.706182                | -2.955546 | 2.451123  |
| 16            | 5             | 0           | 1.206487                | -3.821395 | 2.451123  |
| 17            | 5             | 0           | -1.206487               | -3.821395 | 2.451123  |
| 18            | 5             | 0           | -2.706182               | -2.955546 | 2.451123  |
| 19            | 5             | 0           | -3.912669               | -0.865849 | 2.451123  |
| 20            | 5             | 0           | -3.912669               | 0.865849  | 2.451123  |
| 21            | 5             | 0           | -2.706182               | 2.955546  | 2.451123  |
| 22            | 5             | 0           | -1.206487               | 3.821395  | 2.451123  |
| 23            | 5             | 0           | 1.206487                | 3.821395  | 2.451123  |
| 24            | 5             | 0           | 2.706182                | 2.955546  | 2.451123  |
| 25            | 5             | 0           | -1.206487               | -3.821395 | -2.451123 |
| 26            | 5             | 0           | -2.706182               | -2.955546 | -2.451123 |
| 27            | 5             | 0           | -3.912669               | -0.865849 | -2.451123 |
| 28            | 5             | 0           | -3.912669               | 0.865849  | -2.451123 |
| 29            | 5             | 0           | -2.706182               | 2.955546  | -2.451123 |
| 30            | 5             | 0           | -1.206487               | 3.821395  | -2.451123 |
| 31            | 5             | 0           | 1.206487                | 3.821395  | -2.451123 |
| 32            | 5             | 0           | 2.706182                | 2.955546  | -2.451123 |
| 33            | 5             | 0           | 3.912669                | 0.865849  | -2.451123 |
| 34            | 5             | 0           | 3.912669                | -0.865849 | -2.451123 |
| 35            | 5             | 0           | 2.706182                | -2.955546 | -2.451123 |
| 36            | 5             | 0           | 1.206487                | -3.821395 | -2.451123 |
| 37            | 8             | 0           | 2.908531                | -1.679241 | 2.960446  |
| 38            | 8             | 0           | 1.179873                | -4.853628 | 1.525887  |
| 39            | 8             | 0           | 4.793302                | -1.405014 | 1.525887  |
| 40            | 8             | 0           | 2.908531                | 1.679241  | 2.960446  |
| 41            | 8             | 0           | 3.613429                | 3.448614  | 1.525887  |
| 42            | 8             | 0           | 4.793302                | 1.405014  | 1.525887  |
| 43            | 8             | 0           | -1.179873               | 4.853628  | 1.525887  |
| 44            | 8             | 0           | 1.179873                | 4.853628  | 1.525887  |
| 45            | 8             | 0           | 0.000000                | 3.358483  | 2.960446  |
| 46            | 8             | 0           | -2.908531               | 1.679241  | 2.960446  |
| 47            | 8             | 0           | -4.793302               | 1.405014  | 1.525887  |
| 48            | 8             | 0           | -3.613429               | 3.448614  | 1.525887  |
| 49            | 8             | 0           | 0.000000                | -3.358483 | 2.960446  |
| 50            | 8             | 0           | 3.613429                | -3.448614 | 1.525887  |
| 51            | 8             | 0           | -1.179873               | -4.853628 | 1.525887  |

|    |   |   |           |           |           |
|----|---|---|-----------|-----------|-----------|
| 52 | 8 | 0 | -4.793302 | -1.405014 | 1.525887  |
| 53 | 8 | 0 | -3.613429 | -3.448614 | 1.525887  |
| 54 | 8 | 0 | -2.908531 | -1.679241 | 2.960446  |
| 55 | 8 | 0 | -1.179873 | 4.853628  | -1.525887 |
| 56 | 8 | 0 | 0.000000  | 3.358483  | -2.960446 |
| 57 | 8 | 0 | 1.179873  | 4.853628  | -1.525887 |
| 58 | 8 | 0 | 2.908531  | 1.679241  | -2.960446 |
| 59 | 8 | 0 | 4.793302  | 1.405014  | -1.525887 |
| 60 | 8 | 0 | 3.613429  | 3.448614  | -1.525887 |
| 61 | 8 | 0 | 2.908531  | -1.679241 | -2.960446 |
| 62 | 8 | 0 | 3.613429  | -3.448614 | -1.525887 |
| 63 | 8 | 0 | 4.793302  | -1.405014 | -1.525887 |
| 64 | 8 | 0 | 1.179873  | -4.853628 | -1.525887 |
| 65 | 8 | 0 | -1.179873 | -4.853628 | -1.525887 |
| 66 | 8 | 0 | 0.000000  | -3.358483 | -2.960446 |
| 67 | 8 | 0 | -4.793302 | -1.405014 | -1.525887 |
| 68 | 8 | 0 | -3.613429 | -3.448614 | -1.525887 |
| 69 | 8 | 0 | -2.908531 | -1.679241 | -2.960446 |
| 70 | 8 | 0 | -2.908531 | 1.679241  | -2.960446 |
| 71 | 8 | 0 | -3.613429 | 3.448614  | -1.525887 |
| 72 | 8 | 0 | -4.793302 | 1.405014  | -1.525887 |

-----  
SCF Done: E(RB3LYP) = -3606.65495566

**Table S6:** Theoretical Cartesian coordinates for  $t\text{-B}_{18}$ .

Standard orientation:

| Center Number | Atomic Number | Atomic Type | Coordinates (Angstroms) |           |           |
|---------------|---------------|-------------|-------------------------|-----------|-----------|
|               |               |             | X                       | Y         | Z         |
| 1             | 5             | 0           | -3.516638               | 1.037024  | -5.162021 |
| 2             | 5             | 0           | -2.656408               | 2.526986  | -5.162021 |
| 3             | 5             | 0           | 2.656408                | 2.526986  | -5.162021 |
| 4             | 5             | 0           | 3.516638                | 1.037024  | -5.162021 |
| 5             | 5             | 0           | 0.000000                | 5.054110  | -0.859278 |
| 6             | 5             | 0           | 0.000000                | 5.054110  | 0.859278  |
| 7             | 5             | 0           | -0.868495               | 3.827929  | -6.083610 |
| 8             | 5             | 0           | 0.868495                | 3.827929  | -6.083610 |
| 9             | 5             | 0           | -2.029267               | 4.651279  | -4.242534 |
| 10            | 5             | 0           | -1.167413               | 5.380719  | -2.917467 |
| 11            | 5             | 0           | 1.167413                | 5.380719  | -2.917467 |
| 12            | 5             | 0           | 2.029267                | 4.651279  | -4.242534 |
| 13            | 8             | 0           | 1.193749                | 5.048793  | -1.574929 |
| 14            | 8             | 0           | 0.000000                | 5.972010  | -3.379303 |
| 15            | 8             | 0           | -1.193749               | 5.048793  | -1.574929 |
| 16            | 8             | 0           | -1.422341               | 4.934669  | -5.458944 |
| 17            | 8             | 0           | -1.629933               | 2.673080  | -6.086838 |
| 18            | 8             | 0           | -2.799533               | 3.500359  | -4.177846 |
| 19            | 8             | 0           | 1.422341                | 4.934669  | -5.458944 |
| 20            | 8             | 0           | 2.799533                | 3.500359  | -4.177846 |
| 21            | 8             | 0           | 1.629933                | 2.673080  | -6.086838 |
| 22            | 5             | 0           | 4.376988                | -2.527055 | -0.859278 |
| 23            | 5             | 0           | 4.376988                | -2.527055 | 0.859278  |
| 24            | 5             | 0           | 0.860230                | -3.564010 | -5.162021 |
| 25            | 5             | 0           | -0.860230               | -3.564010 | -5.162021 |
| 26            | 5             | 0           | 3.749331                | -1.161826 | -6.083610 |
| 27            | 5             | 0           | 2.880836                | -2.666103 | -6.083610 |
| 28            | 5             | 0           | 5.042759                | -0.568242 | -4.242534 |
| 29            | 5             | 0           | 5.243546                | -1.679350 | -2.917467 |
| 30            | 5             | 0           | 4.076133                | -3.701369 | -2.917467 |
| 31            | 5             | 0           | 3.013492                | -4.083036 | -4.242534 |
| 32            | 8             | 0           | 5.171913                | -2.986005 | -3.379303 |
| 33            | 8             | 0           | 4.969258                | -1.490579 | -1.574929 |
| 34            | 8             | 0           | 3.775509                | -3.558214 | -1.574929 |
| 35            | 8             | 0           | 3.129922                | 0.075023  | -6.086838 |
| 36            | 8             | 0           | 4.431167                | 0.674287  | -4.177846 |
| 37            | 8             | 0           | 4.984719                | -1.235551 | -5.458944 |
| 38            | 8             | 0           | 3.562378                | -3.699118 | -5.458944 |
| 39            | 8             | 0           | 1.631634                | -4.174646 | -4.177846 |
| 40            | 8             | 0           | 1.499989                | -2.748103 | -6.086838 |
| 41            | 5             | 0           | -2.880836               | -2.666103 | -6.083610 |
| 42            | 5             | 0           | -3.749331               | -1.161826 | -6.083610 |
| 43            | 5             | 0           | -3.013492               | -4.083036 | -4.242534 |
| 44            | 5             | 0           | -4.076133               | -3.701369 | -2.917467 |
| 45            | 5             | 0           | -5.243546               | -1.679350 | -2.917467 |
| 46            | 5             | 0           | -5.042759               | -0.568242 | -4.242534 |
| 47            | 5             | 0           | -4.376988               | -2.527055 | -0.859278 |
| 48            | 5             | 0           | -4.376988               | -2.527055 | 0.859278  |
| 49            | 8             | 0           | -5.171913               | -2.986005 | -3.379303 |
| 50            | 8             | 0           | -3.775509               | -3.558214 | -1.574929 |
| 51            | 8             | 0           | -4.969258               | -1.490579 | -1.574929 |

|     |   |   |           |           |           |
|-----|---|---|-----------|-----------|-----------|
| 52  | 8 | 0 | -3.562378 | -3.699118 | -5.458944 |
| 53  | 8 | 0 | -1.499989 | -2.748103 | -6.086838 |
| 54  | 8 | 0 | -1.631634 | -4.174646 | -4.177846 |
| 55  | 8 | 0 | -4.984719 | -1.235551 | -5.458944 |
| 56  | 8 | 0 | -4.431167 | 0.674287  | -4.177846 |
| 57  | 8 | 0 | -3.129922 | 0.075023  | -6.086838 |
| 58  | 5 | 0 | 3.516638  | 1.037024  | 5.162021  |
| 59  | 5 | 0 | 2.656408  | 2.526986  | 5.162021  |
| 60  | 5 | 0 | 0.860230  | -3.564010 | 5.162021  |
| 61  | 5 | 0 | -0.860230 | -3.564010 | 5.162021  |
| 62  | 5 | 0 | -2.656408 | 2.526986  | 5.162021  |
| 63  | 5 | 0 | -3.516638 | 1.037024  | 5.162021  |
| 64  | 5 | 0 | 2.029267  | 4.651279  | 4.242534  |
| 65  | 5 | 0 | 1.167413  | 5.380719  | 2.917467  |
| 66  | 5 | 0 | -1.167413 | 5.380719  | 2.917467  |
| 67  | 5 | 0 | -2.029267 | 4.651279  | 4.242534  |
| 68  | 5 | 0 | 0.868495  | 3.827929  | 6.083610  |
| 69  | 5 | 0 | -0.868495 | 3.827929  | 6.083610  |
| 70  | 8 | 0 | 0.000000  | 5.972010  | 3.379303  |
| 71  | 8 | 0 | 1.193749  | 5.048793  | 1.574929  |
| 72  | 8 | 0 | -1.193749 | 5.048793  | 1.574929  |
| 73  | 8 | 0 | 1.422341  | 4.934669  | 5.458944  |
| 74  | 8 | 0 | 1.629933  | 2.673080  | 6.086838  |
| 75  | 8 | 0 | 2.799533  | 3.500359  | 4.177846  |
| 76  | 8 | 0 | -1.422341 | 4.934669  | 5.458944  |
| 77  | 8 | 0 | -2.799533 | 3.500359  | 4.177846  |
| 78  | 8 | 0 | -1.629933 | 2.673080  | 6.086838  |
| 79  | 5 | 0 | -3.749331 | -1.161826 | 6.083610  |
| 80  | 5 | 0 | -2.880836 | -2.666103 | 6.083610  |
| 81  | 5 | 0 | -5.042759 | -0.568242 | 4.242534  |
| 82  | 5 | 0 | -5.243546 | -1.679350 | 2.917467  |
| 83  | 5 | 0 | -4.076133 | -3.701369 | 2.917467  |
| 84  | 5 | 0 | -3.013492 | -4.083036 | 4.242534  |
| 85  | 8 | 0 | -5.171913 | -2.986005 | 3.379303  |
| 86  | 8 | 0 | -4.969258 | -1.490579 | 1.574929  |
| 87  | 8 | 0 | -3.775509 | -3.558214 | 1.574929  |
| 88  | 8 | 0 | -4.984719 | -1.235551 | 5.458944  |
| 89  | 8 | 0 | -3.129922 | 0.075023  | 6.086838  |
| 90  | 8 | 0 | -4.431167 | 0.674287  | 4.177846  |
| 91  | 8 | 0 | -3.562378 | -3.699118 | 5.458944  |
| 92  | 8 | 0 | -1.631634 | -4.174646 | 4.177846  |
| 93  | 8 | 0 | -1.499989 | -2.748103 | 6.086838  |
| 94  | 5 | 0 | 2.880836  | -2.666103 | 6.083610  |
| 95  | 5 | 0 | 3.749331  | -1.161826 | 6.083610  |
| 96  | 5 | 0 | 3.013492  | -4.083036 | 4.242534  |
| 97  | 5 | 0 | 4.076133  | -3.701369 | 2.917467  |
| 98  | 5 | 0 | 5.243546  | -1.679350 | 2.917467  |
| 99  | 5 | 0 | 5.042759  | -0.568242 | 4.242534  |
| 100 | 8 | 0 | 5.171913  | -2.986005 | 3.379303  |
| 101 | 8 | 0 | 3.775509  | -3.558214 | 1.574929  |
| 102 | 8 | 0 | 4.969258  | -1.490579 | 1.574929  |
| 103 | 8 | 0 | 3.562378  | -3.699118 | 5.458944  |
| 104 | 8 | 0 | 1.499989  | -2.748103 | 6.086838  |
| 105 | 8 | 0 | 1.631634  | -4.174646 | 4.177846  |
| 106 | 8 | 0 | 4.984719  | -1.235551 | 5.458944  |
| 107 | 8 | 0 | 4.431167  | 0.674287  | 4.177846  |
| 108 | 8 | 0 | 3.129922  | 0.075023  | 6.086838  |

SCF Done: E(RB3LYP) = -3606.54865628

---

**Table S7:** Theoretical Cartesian coordinates for  $c\text{-B}_{30}$ .  
Standard orientation:

| Center Number | Atomic Number | Atomic Type | Coordinates (Angstroms) |           |           |
|---------------|---------------|-------------|-------------------------|-----------|-----------|
|               |               |             | X                       | Y         | Z         |
| 1             | 5             | 0           | -2.599018               | -2.110392 | 5.234352  |
| 2             | 5             | 0           | -1.203961               | -3.123960 | 5.234352  |
| 3             | 5             | 0           | 3.343107                | 0.179678  | 5.234352  |
| 4             | 5             | 0           | 2.810243                | 1.819666  | 5.234352  |
| 5             | 5             | 0           | -3.343107               | 0.179678  | 5.234352  |
| 6             | 5             | 0           | -2.810243               | 1.819666  | 5.234352  |
| 7             | 5             | 0           | 0.862193                | 3.235008  | 5.234352  |
| 8             | 5             | 0           | -0.862193               | 3.235008  | 5.234352  |
| 9             | 5             | 0           | 3.343107                | 4.601392  | 2.501583  |
| 10            | 5             | 0           | 2.810243                | 3.867967  | 3.968433  |
| 11            | 5             | 0           | -2.810243               | 3.867967  | 3.968433  |
| 12            | 5             | 0           | -3.343107               | 4.601392  | 2.501583  |
| 13            | 5             | 0           | -4.547068               | -1.477432 | 3.968433  |
| 14            | 5             | 0           | -5.409261               | -1.757576 | 2.501583  |
| 15            | 5             | 0           | -5.409261               | -3.023495 | 0.453282  |
| 16            | 5             | 0           | -4.547068               | -4.210202 | -0.453282 |
| 17            | 5             | 0           | -2.599018               | -5.625543 | -0.453282 |
| 18            | 5             | 0           | -1.203961               | -6.078825 | 0.453282  |
| 19            | 5             | 0           | 0.000000                | -5.687634 | 2.501583  |
| 20            | 5             | 0           | 0.000000                | -4.781071 | 3.968433  |
| 21            | 5             | 0           | 1.203961                | -6.078825 | 0.453282  |
| 22            | 5             | 0           | 2.599018                | -5.625543 | -0.453282 |
| 23            | 5             | 0           | 4.547068                | -4.210202 | -0.453282 |
| 24            | 5             | 0           | 5.409261                | -3.023495 | 0.453282  |
| 25            | 5             | 0           | 5.409261                | -1.757576 | 2.501583  |
| 26            | 5             | 0           | 4.547068                | -1.477432 | 3.968433  |
| 27            | 5             | 0           | 2.599018                | -2.110392 | 5.234352  |
| 28            | 5             | 0           | 1.203961                | -3.123960 | 5.234352  |
| 29            | 5             | 0           | 2.810243                | -1.819666 | -5.234352 |
| 30            | 5             | 0           | 3.343107                | -0.179678 | -5.234352 |
| 31            | 5             | 0           | 4.547068                | 1.477432  | -3.968433 |
| 32            | 5             | 0           | 5.409261                | 1.757576  | -2.501583 |
| 33            | 5             | 0           | 6.153350                | 0.733425  | -0.453282 |
| 34            | 5             | 0           | 6.153350                | -0.733425 | 0.453282  |
| 35            | 5             | 0           | 3.343107                | -4.601392 | -2.501583 |
| 36            | 5             | 0           | 2.810243                | -3.867967 | -3.968433 |
| 37            | 5             | 0           | 0.862193                | -3.235008 | -5.234352 |
| 38            | 5             | 0           | -0.862193               | -3.235008 | -5.234352 |
| 39            | 5             | 0           | -2.810243               | -1.819666 | -5.234352 |
| 40            | 5             | 0           | -3.343107               | -0.179678 | -5.234352 |
| 41            | 5             | 0           | -2.599018               | 2.110392  | -5.234352 |
| 42            | 5             | 0           | -1.203961               | 3.123960  | -5.234352 |
| 43            | 5             | 0           | 1.203961                | 3.123960  | -5.234352 |
| 44            | 5             | 0           | 2.599018                | 2.110392  | -5.234352 |
| 45            | 5             | 0           | 5.409261                | 3.023495  | -0.453282 |
| 46            | 5             | 0           | 4.547068                | 4.210202  | 0.453282  |
| 47            | 5             | 0           | 2.599018                | 5.625543  | 0.453282  |
| 48            | 5             | 0           | 1.203961                | 6.078825  | -0.453282 |
| 49            | 5             | 0           | -1.203961               | 6.078825  | -0.453282 |
| 50            | 5             | 0           | -2.599018               | 5.625543  | 0.453282  |
| 51            | 5             | 0           | 0.000000                | 4.781071  | -3.968433 |

|     |   |   |           |           |           |
|-----|---|---|-----------|-----------|-----------|
| 52  | 5 | 0 | 0.000000  | 5.687634  | -2.501583 |
| 53  | 5 | 0 | -6.153350 | -0.733425 | 0.453282  |
| 54  | 5 | 0 | -6.153350 | 0.733425  | -0.453282 |
| 55  | 5 | 0 | -5.409261 | 1.757576  | -2.501583 |
| 56  | 5 | 0 | -4.547068 | 1.477432  | -3.968433 |
| 57  | 5 | 0 | -3.343107 | -4.601392 | -2.501583 |
| 58  | 5 | 0 | -2.810243 | -3.867967 | -3.968433 |
| 59  | 5 | 0 | -5.409261 | 3.023495  | -0.453282 |
| 60  | 5 | 0 | -4.547068 | 4.210202  | 0.453282  |
| 61  | 8 | 0 | 3.696597  | -5.087930 | 0.196963  |
| 62  | 8 | 0 | 4.431601  | -4.076284 | -1.826329 |
| 63  | 8 | 0 | 2.507336  | -5.474344 | -1.826329 |
| 64  | 8 | 0 | 1.189261  | -5.902613 | 1.826329  |
| 65  | 8 | 0 | -1.189261 | -5.902613 | 1.826329  |
| 66  | 8 | 0 | 0.000000  | -6.289027 | -0.196963 |
| 67  | 8 | 0 | -3.696597 | -5.087930 | 0.196963  |
| 68  | 8 | 0 | -2.507336 | -5.474344 | -1.826329 |
| 69  | 8 | 0 | -4.431601 | -4.076284 | -1.826329 |
| 70  | 8 | 0 | -5.981220 | -1.943416 | -0.196963 |
| 71  | 8 | 0 | -5.981220 | -0.692953 | 1.826329  |
| 72  | 8 | 0 | -5.246216 | -2.955062 | 1.826329  |
| 73  | 8 | 0 | -3.473884 | -2.758099 | -4.462698 |
| 74  | 8 | 0 | -1.549619 | -4.156160 | -4.462698 |
| 75  | 8 | 0 | -1.549619 | -2.132868 | -5.713161 |
| 76  | 8 | 0 | 1.549619  | -2.132868 | -5.713161 |
| 77  | 8 | 0 | 3.473884  | -2.758099 | -4.462698 |
| 78  | 8 | 0 | 1.549619  | -4.156160 | -4.462698 |
| 79  | 8 | 0 | 3.696597  | 2.451561  | -4.462698 |
| 80  | 8 | 0 | 2.507336  | 0.814683  | -5.713161 |
| 81  | 8 | 0 | 4.431601  | 0.189451  | -4.462698 |
| 82  | 8 | 0 | 5.981220  | 1.943416  | 0.196963  |
| 83  | 8 | 0 | 5.246216  | 2.955062  | -1.826329 |
| 84  | 8 | 0 | 5.981220  | 0.692953  | -1.826329 |
| 85  | 8 | 0 | 1.189261  | 5.902613  | -1.826329 |
| 86  | 8 | 0 | 0.000000  | 6.289027  | 0.196963  |
| 87  | 8 | 0 | -1.189261 | 5.902613  | -1.826329 |
| 88  | 8 | 0 | 0.000000  | 2.636369  | -5.713161 |
| 89  | 8 | 0 | 1.189261  | 4.273247  | -4.462698 |
| 90  | 8 | 0 | -1.189261 | 4.273247  | -4.462698 |
| 91  | 8 | 0 | 3.696597  | 5.087930  | -0.196963 |
| 92  | 8 | 0 | 2.507336  | 5.474344  | 1.826329  |
| 93  | 8 | 0 | 4.431601  | 4.076284  | 1.826329  |
| 94  | 8 | 0 | 5.246216  | -2.955062 | 1.826329  |
| 95  | 8 | 0 | 5.981220  | -0.692953 | 1.826329  |
| 96  | 8 | 0 | 5.981220  | -1.943416 | -0.196963 |
| 97  | 8 | 0 | 1.549619  | 2.132868  | 5.713161  |
| 98  | 8 | 0 | 3.473884  | 2.758099  | 4.462698  |
| 99  | 8 | 0 | 1.549619  | 4.156160  | 4.462698  |
| 100 | 8 | 0 | -4.431601 | 0.189451  | -4.462698 |
| 101 | 8 | 0 | -2.507336 | 0.814683  | -5.713161 |
| 102 | 8 | 0 | -3.696597 | 2.451561  | -4.462698 |
| 103 | 8 | 0 | -5.981220 | 0.692953  | -1.826329 |
| 104 | 8 | 0 | -5.246216 | 2.955062  | -1.826329 |
| 105 | 8 | 0 | -5.981220 | 1.943416  | 0.196963  |
| 106 | 8 | 0 | -3.696597 | -2.451561 | 4.462698  |
| 107 | 8 | 0 | -2.507336 | -0.814683 | 5.713161  |
| 108 | 8 | 0 | -4.431601 | -0.189451 | 4.462698  |
| 109 | 8 | 0 | -3.473884 | 2.758099  | 4.462698  |

|     |   |   |           |           |           |
|-----|---|---|-----------|-----------|-----------|
| 110 | 8 | 0 | -1.549619 | 2.132868  | 5.713161  |
| 111 | 8 | 0 | -1.549619 | 4.156160  | 4.462698  |
| 112 | 8 | 0 | -4.431601 | 4.076284  | 1.826329  |
| 113 | 8 | 0 | -2.507336 | 5.474344  | 1.826329  |
| 114 | 8 | 0 | -3.696597 | 5.087930  | -0.196963 |
| 115 | 8 | 0 | -1.189261 | -4.273247 | 4.462698  |
| 116 | 8 | 0 | 1.189261  | -4.273247 | 4.462698  |
| 117 | 8 | 0 | 0.000000  | -2.636369 | 5.713161  |
| 118 | 8 | 0 | 2.507336  | -0.814683 | 5.713161  |
| 119 | 8 | 0 | 3.696597  | -2.451561 | 4.462698  |
| 120 | 8 | 0 | 4.431601  | -0.189451 | 4.462698  |

---

SCF Done: E(RB3LYP) = -6011.35441125



**Table S8:** Theoretical Cartesian coordinates for *c*-**B<sub>30</sub>-2**.  
Standard orientation:

| Center Number | Atomic Number | Atomic Type | Coordinates (Angstroms) |           |           |
|---------------|---------------|-------------|-------------------------|-----------|-----------|
|               |               |             | X                       | Y         | Z         |
| 1             | 5             | 0           | -0.933478               | -4.864340 | 2.991843  |
| 2             | 5             | 0           | -1.949406               | -3.451205 | 3.145131  |
| 3             | 5             | 0           | -1.429910               | -5.023665 | 0.643747  |
| 4             | 5             | 0           | -2.664713               | -5.111641 | -0.564985 |
| 5             | 5             | 0           | 4.687948                | -3.110548 | -0.980836 |
| 6             | 5             | 0           | 3.704025                | -3.359247 | -2.379802 |
| 7             | 5             | 0           | 2.842441                | -4.386506 | 2.017701  |
| 8             | 5             | 0           | 4.297433                | -3.704834 | 1.403966  |
| 9             | 5             | 0           | 1.454008                | -4.552871 | -1.631388 |
| 10            | 5             | 0           | 0.990859                | -4.328540 | 0.040685  |
| 11            | 5             | 0           | -0.334756               | -4.683919 | -3.390642 |
| 12            | 5             | 0           | -2.018676               | -4.797014 | -2.960082 |
| 13            | 5             | 0           | -4.468037               | -3.404747 | 0.062742  |
| 14            | 5             | 0           | -3.743123               | -2.620589 | 1.438359  |
| 15            | 5             | 0           | 5.522654                | 2.126306  | 1.485952  |
| 16            | 5             | 0           | 6.006588                | 0.500710  | 1.191965  |
| 17            | 5             | 0           | 3.183674                | -1.025386 | 3.094248  |
| 18            | 5             | 0           | 4.738383                | -1.398442 | 2.371099  |
| 19            | 5             | 0           | 0.842274                | -2.697207 | -4.338909 |
| 20            | 5             | 0           | -0.056901               | -1.431908 | -3.559588 |
| 21            | 5             | 0           | 0.393660                | 1.611412  | 5.020673  |
| 22            | 5             | 0           | -0.771713               | 2.900711  | 4.860234  |
| 23            | 5             | 0           | 2.665557                | 1.527855  | 3.762516  |
| 24            | 5             | 0           | 3.731783                | 2.759607  | 3.153162  |
| 25            | 5             | 0           | -3.523367               | -2.778756 | -2.968354 |
| 26            | 5             | 0           | -2.393683               | -1.490149 | -2.619251 |
| 27            | 5             | 0           | -4.872735               | 1.545195  | -2.373058 |
| 28            | 5             | 0           | -3.240013               | 1.042459  | -2.738369 |
| 29            | 5             | 0           | -5.582012               | -2.108052 | -1.754552 |
| 30            | 5             | 0           | -6.051748               | -0.463544 | -1.504293 |
| 31            | 5             | 0           | 1.877666                | 3.533796  | -3.359996 |
| 32            | 5             | 0           | 0.877628                | 4.943887  | -3.186953 |
| 33            | 5             | 0           | 2.157824                | 1.535382  | -4.730779 |
| 34            | 5             | 0           | 0.522684                | 1.028685  | -4.441721 |
| 35            | 5             | 0           | -1.461162               | 4.334061  | -3.689524 |
| 36            | 5             | 0           | -1.403300               | 2.615988  | -3.985254 |
| 37            | 5             | 0           | -3.099874               | 4.495445  | -2.035928 |
| 38            | 5             | 0           | -4.554098               | 3.835245  | -1.404188 |
| 39            | 5             | 0           | 1.303606                | -4.414398 | 3.746330  |
| 40            | 5             | 0           | 1.401041                | -2.703593 | 4.079887  |
| 41            | 5             | 0           | -1.863710               | -1.274559 | 4.582633  |
| 42            | 5             | 0           | -0.217238               | -0.898649 | 5.008213  |
| 43            | 5             | 0           | -5.592907               | 0.563756  | 0.787203  |
| 44            | 5             | 0           | -4.700818               | -0.207966 | 2.064488  |
| 45            | 5             | 0           | -1.064387               | 4.256078  | -0.218887 |
| 46            | 5             | 0           | -1.167751               | 3.353960  | 1.266617  |
| 47            | 5             | 0           | -4.806336               | 3.029718  | 0.910829  |
| 48            | 5             | 0           | -3.627456               | 3.073009  | 2.175659  |
| 49            | 5             | 0           | -3.528611               | 0.700327  | 4.174658  |
| 50            | 5             | 0           | -3.117066               | 2.381340  | 4.412324  |
| 51            | 5             | 0           | 2.076447                | 4.578459  | 2.664190  |
| 52            | 5             | 0           | 0.533429                | 3.906113  | 3.062667  |

|     |   |   |           |           |           |
|-----|---|---|-----------|-----------|-----------|
| 53  | 5 | 0 | 2.471528  | 5.309601  | 0.347368  |
| 54  | 5 | 0 | 1.300601  | 5.444344  | -0.910536 |
| 55  | 5 | 0 | 4.142305  | 3.421560  | -0.248174 |
| 56  | 5 | 0 | 3.357469  | 2.498833  | -1.513120 |
| 57  | 5 | 0 | 5.504590  | -0.606501 | -1.012737 |
| 58  | 5 | 0 | 4.656496  | 0.269326  | -2.254367 |
| 59  | 5 | 0 | 3.236128  | -1.947313 | -4.448874 |
| 60  | 5 | 0 | 3.787529  | -0.296421 | -4.530492 |
| 61  | 8 | 0 | 3.191355  | 0.755179  | -5.173519 |
| 62  | 8 | 0 | 5.397245  | -1.952831 | -0.776465 |
| 63  | 8 | 0 | 6.235697  | 0.139669  | -0.116947 |
| 64  | 8 | 0 | 5.676365  | -0.428813 | 2.146468  |
| 65  | 8 | 0 | 5.009910  | -2.684484 | 1.986934  |
| 66  | 8 | 0 | 4.535060  | -3.990403 | 0.067648  |
| 67  | 8 | 0 | 4.763712  | -0.037666 | -3.582204 |
| 68  | 8 | 0 | 3.732898  | 1.255776  | -1.929708 |
| 69  | 8 | 0 | 2.252691  | 3.096270  | -2.098058 |
| 70  | 8 | 0 | 2.370706  | 2.867895  | -4.453500 |
| 71  | 8 | 0 | -1.052878 | -1.826785 | -2.685747 |
| 72  | 8 | 0 | -0.376536 | 2.047936  | -4.694350 |
| 73  | 8 | 0 | 0.064324  | -0.105400 | -3.843374 |
| 74  | 8 | 0 | -2.392432 | 1.864483  | -3.418364 |
| 75  | 8 | 0 | -2.806283 | -0.211342 | -2.373766 |
| 76  | 8 | 0 | -2.074956 | 4.374918  | -1.121003 |
| 77  | 8 | 0 | -2.731614 | 4.785240  | -3.322875 |
| 78  | 8 | 0 | -0.398142 | 5.198870  | -3.639845 |
| 79  | 8 | 0 | 1.431398  | 5.800163  | -2.235098 |
| 80  | 8 | 0 | 0.124575  | 4.824426  | -0.553092 |
| 81  | 8 | 0 | 0.255619  | -3.928826 | -4.386940 |
| 82  | 8 | 0 | 2.057817  | -2.447235 | -4.928583 |
| 83  | 8 | 0 | 3.979948  | -2.654242 | -3.523358 |
| 84  | 8 | 0 | 2.520116  | -4.043217 | -2.321009 |
| 85  | 8 | 0 | 0.470866  | -5.163742 | -2.378360 |
| 86  | 8 | 0 | 0.192452  | -5.213434 | 3.705663  |
| 87  | 8 | 0 | 2.518171  | -4.894580 | 3.251052  |
| 88  | 8 | 0 | 1.758629  | -4.222009 | 1.156532  |
| 89  | 8 | 0 | -0.379774 | -4.231984 | 0.185937  |
| 90  | 8 | 0 | -1.270289 | -5.614756 | 1.883525  |
| 91  | 8 | 0 | -3.913713 | -4.519987 | -0.505080 |
| 92  | 8 | 0 | -5.532322 | -2.815323 | -0.570921 |
| 93  | 8 | 0 | -4.871569 | -2.573240 | -2.837450 |
| 94  | 8 | 0 | -3.020857 | -3.967900 | -3.417064 |
| 95  | 8 | 0 | -2.243216 | -5.531966 | -1.810188 |
| 96  | 8 | 0 | -6.231920 | -0.183355 | -0.162450 |
| 97  | 8 | 0 | -5.584315 | 1.930147  | 0.632491  |
| 98  | 8 | 0 | -4.763651 | 4.026961  | -0.048333 |
| 99  | 8 | 0 | -5.227116 | 2.822063  | -2.054477 |
| 100 | 8 | 0 | -5.827246 | 0.553041  | -2.393224 |
| 101 | 8 | 0 | -4.075594 | -1.424445 | 1.998501  |
| 102 | 8 | 0 | -4.480834 | 0.562344  | 3.181819  |
| 103 | 8 | 0 | -2.899123 | -0.392673 | 4.691628  |
| 104 | 8 | 0 | -2.088671 | -2.557437 | 4.156826  |
| 105 | 8 | 0 | -2.664615 | -3.297570 | 1.968625  |
| 106 | 8 | 0 | 0.017931  | 3.210735  | 1.967265  |
| 107 | 8 | 0 | -2.309799 | 2.799866  | 1.780135  |
| 108 | 8 | 0 | -3.777340 | 3.223980  | 3.527461  |
| 109 | 8 | 0 | -2.100885 | 2.842389  | 5.207328  |
| 110 | 8 | 0 | -0.281129 | 3.989268  | 4.171646  |

|     |   |   |          |           |          |
|-----|---|---|----------|-----------|----------|
| 111 | 8 | 0 | 5.238969 | 2.882070  | 0.376140 |
| 112 | 8 | 0 | 3.658538 | 4.625736  | 0.170958 |
| 113 | 8 | 0 | 2.037599 | 5.520398  | 1.644911 |
| 114 | 8 | 0 | 4.984167 | 2.424908  | 2.713724 |
| 115 | 8 | 0 | 3.305606 | 4.058316  | 3.007734 |
| 116 | 8 | 0 | 2.689486 | 0.190947  | 3.471325 |
| 117 | 8 | 0 | 2.383625 | -2.130993 | 3.285907 |
| 118 | 8 | 0 | 1.617697 | 2.009025  | 4.513910 |
| 119 | 8 | 0 | 0.222289 | 0.322699  | 5.427196 |
| 120 | 8 | 0 | 0.663062 | -1.946988 | 4.931409 |

---

SCF Done: E(RB3LYP) = -6011.05205759

**Table S9:** Theoretical Cartesian coordinates for  $t\text{-B}_{36}$ .  
Standard orientation:

| Center Number | Atomic Number | Atomic Type | Coordinates (Angstroms) |           |           |
|---------------|---------------|-------------|-------------------------|-----------|-----------|
|               |               |             | X                       | Y         | Z         |
| 1             | 5             | 0           | 4.854302                | 0.859319  | 4.854302  |
| 2             | 5             | 0           | 4.854302                | -0.859319 | 4.854302  |
| 3             | 5             | 0           | 5.816036                | 2.939025  | 4.168971  |
| 4             | 5             | 0           | 5.816036                | 4.168971  | 2.939025  |
| 5             | 5             | 0           | 2.939025                | 4.168971  | 5.816036  |
| 6             | 5             | 0           | 4.168971                | 2.939025  | 5.816036  |
| 7             | 5             | 0           | 4.854302                | 4.854302  | 0.859319  |
| 8             | 5             | 0           | 4.854302                | 4.854302  | -0.859319 |
| 9             | 5             | 0           | 0.859319                | 4.854302  | 4.854302  |
| 10            | 5             | 0           | -0.859319               | 4.854302  | 4.854302  |
| 11            | 5             | 0           | 2.939025                | 5.816036  | 4.168971  |
| 12            | 5             | 0           | 4.168971                | 5.816036  | 2.939025  |
| 13            | 8             | 0           | 5.386652                | 3.447040  | 5.386652  |
| 14            | 8             | 0           | 3.987768                | 1.574149  | 5.675012  |
| 15            | 8             | 0           | 5.675012                | 1.574149  | 3.987768  |
| 16            | 8             | 0           | 5.386652                | 5.386652  | 3.447040  |
| 17            | 8             | 0           | 3.987768                | 5.675012  | 1.574149  |
| 18            | 8             | 0           | 5.675012                | 3.987768  | 1.574149  |
| 19            | 8             | 0           | 3.447040                | 5.386652  | 5.386652  |
| 20            | 8             | 0           | 1.574149                | 5.675012  | 3.987768  |
| 21            | 8             | 0           | 1.574149                | 3.987768  | 5.675012  |
| 22            | 5             | 0           | 0.859319                | 4.854302  | -4.854302 |
| 23            | 5             | 0           | -0.859319               | 4.854302  | -4.854302 |
| 24            | 5             | 0           | 4.854302                | 0.859319  | -4.854302 |
| 25            | 5             | 0           | 4.854302                | -0.859319 | -4.854302 |
| 26            | 5             | 0           | 4.168971                | 2.939025  | -5.816036 |
| 27            | 5             | 0           | 2.939025                | 4.168971  | -5.816036 |
| 28            | 5             | 0           | 5.816036                | 4.168971  | -2.939025 |
| 29            | 5             | 0           | 5.816036                | 2.939025  | -4.168971 |
| 30            | 5             | 0           | 4.168971                | 5.816036  | -2.939025 |
| 31            | 5             | 0           | 2.939025                | 5.816036  | -4.168971 |
| 32            | 8             | 0           | 5.386652                | 3.447040  | -5.386652 |
| 33            | 8             | 0           | 5.675012                | 1.574149  | -3.987768 |
| 34            | 8             | 0           | 3.987768                | 1.574149  | -5.675012 |
| 35            | 8             | 0           | 3.447040                | 5.386652  | -5.386652 |
| 36            | 8             | 0           | 1.574149                | 5.675012  | -3.987768 |
| 37            | 8             | 0           | 1.574149                | 3.987768  | -5.675012 |
| 38            | 8             | 0           | 5.386652                | 5.386652  | -3.447040 |
| 39            | 8             | 0           | 3.987768                | 5.675012  | -1.574149 |
| 40            | 8             | 0           | 5.675012                | 3.987768  | -1.574149 |
| 41            | 5             | 0           | 0.859319                | -4.854302 | -4.854302 |
| 42            | 5             | 0           | -0.859319               | -4.854302 | -4.854302 |
| 43            | 5             | 0           | 4.854302                | -4.854302 | -0.859319 |
| 44            | 5             | 0           | 4.854302                | -4.854302 | 0.859319  |
| 45            | 5             | 0           | 4.168971                | -5.816036 | -2.939025 |
| 46            | 5             | 0           | 2.939025                | -5.816036 | -4.168971 |
| 47            | 5             | 0           | 4.168971                | -2.939025 | -5.816036 |
| 48            | 5             | 0           | 2.939025                | -4.168971 | -5.816036 |
| 49            | 5             | 0           | 5.816036                | -2.939025 | -4.168971 |
| 50            | 5             | 0           | 5.816036                | -4.168971 | -2.939025 |
| 51            | 8             | 0           | 5.386652                | -5.386652 | -3.447040 |

|     |   |   |           |           |           |
|-----|---|---|-----------|-----------|-----------|
| 52  | 8 | 0 | 5.675012  | -3.987768 | -1.574149 |
| 53  | 8 | 0 | 3.987768  | -5.675012 | -1.574149 |
| 54  | 8 | 0 | 3.447040  | -5.386652 | -5.386652 |
| 55  | 8 | 0 | 1.574149  | -5.675012 | -3.987768 |
| 56  | 8 | 0 | 1.574149  | -3.987768 | -5.675012 |
| 57  | 8 | 0 | 5.386652  | -3.447040 | -5.386652 |
| 58  | 8 | 0 | 3.987768  | -1.574149 | -5.675012 |
| 59  | 8 | 0 | 5.675012  | -1.574149 | -3.987768 |
| 60  | 5 | 0 | 0.859319  | -4.854302 | 4.854302  |
| 61  | 5 | 0 | -0.859319 | -4.854302 | 4.854302  |
| 62  | 5 | 0 | 4.168971  | -2.939025 | 5.816036  |
| 63  | 5 | 0 | 2.939025  | -4.168971 | 5.816036  |
| 64  | 5 | 0 | 4.168971  | -5.816036 | 2.939025  |
| 65  | 5 | 0 | 2.939025  | -5.816036 | 4.168971  |
| 66  | 5 | 0 | 5.816036  | -4.168971 | 2.939025  |
| 67  | 5 | 0 | 5.816036  | -2.939025 | 4.168971  |
| 68  | 8 | 0 | 5.386652  | -3.447040 | 5.386652  |
| 69  | 8 | 0 | 3.987768  | -1.574149 | 5.675012  |
| 70  | 8 | 0 | 5.675012  | -1.574149 | 3.987768  |
| 71  | 8 | 0 | 3.447040  | -5.386652 | 5.386652  |
| 72  | 8 | 0 | 1.574149  | -3.987768 | 5.675012  |
| 73  | 8 | 0 | 1.574149  | -5.675012 | 3.987768  |
| 74  | 8 | 0 | 5.386652  | -5.386652 | 3.447040  |
| 75  | 8 | 0 | 3.987768  | -5.675012 | 1.574149  |
| 76  | 8 | 0 | 5.675012  | -3.987768 | 1.574149  |
| 77  | 5 | 0 | -4.854302 | 4.854302  | 0.859319  |
| 78  | 5 | 0 | -4.854302 | 4.854302  | -0.859319 |
| 79  | 5 | 0 | -4.854302 | -0.859319 | 4.854302  |
| 80  | 5 | 0 | -4.854302 | 0.859319  | 4.854302  |
| 81  | 5 | 0 | -4.168971 | 2.939025  | 5.816036  |
| 82  | 5 | 0 | -2.939025 | 4.168971  | 5.816036  |
| 83  | 5 | 0 | -4.168971 | 5.816036  | 2.939025  |
| 84  | 5 | 0 | -2.939025 | 5.816036  | 4.168971  |
| 85  | 5 | 0 | -5.816036 | 4.168971  | 2.939025  |
| 86  | 5 | 0 | -5.816036 | 2.939025  | 4.168971  |
| 87  | 8 | 0 | -5.386652 | 3.447040  | 5.386652  |
| 88  | 8 | 0 | -5.675012 | 1.574149  | 3.987768  |
| 89  | 8 | 0 | -3.987768 | 1.574149  | 5.675012  |
| 90  | 8 | 0 | -3.447040 | 5.386652  | 5.386652  |
| 91  | 8 | 0 | -1.574149 | 3.987768  | 5.675012  |
| 92  | 8 | 0 | -1.574149 | 5.675012  | 3.987768  |
| 93  | 8 | 0 | -5.386652 | 5.386652  | 3.447040  |
| 94  | 8 | 0 | -3.987768 | 5.675012  | 1.574149  |
| 95  | 8 | 0 | -5.675012 | 3.987768  | 1.574149  |
| 96  | 5 | 0 | -4.854302 | 0.859319  | -4.854302 |
| 97  | 5 | 0 | -4.854302 | -0.859319 | -4.854302 |
| 98  | 5 | 0 | -2.939025 | 4.168971  | -5.816036 |
| 99  | 5 | 0 | -4.168971 | 2.939025  | -5.816036 |
| 100 | 5 | 0 | -5.816036 | 4.168971  | -2.939025 |
| 101 | 5 | 0 | -5.816036 | 2.939025  | -4.168971 |
| 102 | 5 | 0 | -4.168971 | 5.816036  | -2.939025 |
| 103 | 5 | 0 | -2.939025 | 5.816036  | -4.168971 |
| 104 | 8 | 0 | -3.447040 | 5.386652  | -5.386652 |
| 105 | 8 | 0 | -1.574149 | 5.675012  | -3.987768 |
| 106 | 8 | 0 | -1.574149 | 3.987768  | -5.675012 |
| 107 | 8 | 0 | -5.386652 | 5.386652  | -3.447040 |
| 108 | 8 | 0 | -3.987768 | 5.675012  | -1.574149 |
| 109 | 8 | 0 | -5.675012 | 3.987768  | -1.574149 |

|     |   |   |           |           |           |
|-----|---|---|-----------|-----------|-----------|
| 110 | 8 | 0 | -5.386652 | 3.447040  | -5.386652 |
| 111 | 8 | 0 | -5.675012 | 1.574149  | -3.987768 |
| 112 | 8 | 0 | -3.987768 | 1.574149  | -5.675012 |
| 113 | 5 | 0 | -4.854302 | -4.854302 | 0.859319  |
| 114 | 5 | 0 | -4.854302 | -4.854302 | -0.859319 |
| 115 | 5 | 0 | -5.816036 | -4.168971 | -2.939025 |
| 116 | 5 | 0 | -5.816036 | -2.939025 | -4.168971 |
| 117 | 5 | 0 | -2.939025 | -4.168971 | -5.816036 |
| 118 | 5 | 0 | -4.168971 | -2.939025 | -5.816036 |
| 119 | 5 | 0 | -2.939025 | -5.816036 | -4.168971 |
| 120 | 5 | 0 | -4.168971 | -5.816036 | -2.939025 |
| 121 | 8 | 0 | -5.386652 | -3.447040 | -5.386652 |
| 122 | 8 | 0 | -5.675012 | -1.574149 | -3.987768 |
| 123 | 8 | 0 | -3.987768 | -1.574149 | -5.675012 |
| 124 | 8 | 0 | -3.447040 | -5.386652 | -5.386652 |
| 125 | 8 | 0 | -1.574149 | -3.987768 | -5.675012 |
| 126 | 8 | 0 | -1.574149 | -5.675012 | -3.987768 |
| 127 | 8 | 0 | -5.386652 | -5.386652 | -3.447040 |
| 128 | 8 | 0 | -3.987768 | -5.675012 | -1.574149 |
| 129 | 8 | 0 | -5.675012 | -3.987768 | -1.574149 |
| 130 | 5 | 0 | -2.939025 | -4.168971 | 5.816036  |
| 131 | 5 | 0 | -4.168971 | -2.939025 | 5.816036  |
| 132 | 5 | 0 | -5.816036 | -4.168971 | 2.939025  |
| 133 | 5 | 0 | -5.816036 | -2.939025 | 4.168971  |
| 134 | 5 | 0 | -4.168971 | -5.816036 | 2.939025  |
| 135 | 5 | 0 | -2.939025 | -5.816036 | 4.168971  |
| 136 | 8 | 0 | -3.447040 | -5.386652 | 5.386652  |
| 137 | 8 | 0 | -1.574149 | -5.675012 | 3.987768  |
| 138 | 8 | 0 | -1.574149 | -3.987768 | 5.675012  |
| 139 | 8 | 0 | -5.386652 | -3.447040 | 5.386652  |
| 140 | 8 | 0 | -3.987768 | -1.574149 | 5.675012  |
| 141 | 8 | 0 | -5.675012 | -1.574149 | 3.987768  |
| 142 | 8 | 0 | -5.386652 | -5.386652 | 3.447040  |
| 143 | 8 | 0 | -5.675012 | -3.987768 | 1.574149  |
| 144 | 8 | 0 | -3.987768 | -5.675012 | 1.574149  |

-----  
SCF Done: E(RB3LYP) = -7213.15920077

**Table S10:** Theoretical Cartesian coordinates for *t*-**B**<sub>36</sub>-**2**.  
Standard orientation:

| Center Number | Atomic Number | Atomic Type | Coordinates (Angstroms) |           |           |
|---------------|---------------|-------------|-------------------------|-----------|-----------|
|               |               |             | X                       | Y         | Z         |
| 1             | 5             | 0           | -4.107433               | 0.000000  | 5.324543  |
| 2             | 5             | 0           | -5.324543               | 0.000000  | 4.107433  |
| 3             | 5             | 0           | -4.107433               | 5.324543  | 0.000000  |
| 4             | 5             | 0           | -5.324543               | 4.107433  | 0.000000  |
| 5             | 5             | 0           | -4.107433               | 0.000000  | -5.324543 |
| 6             | 5             | 0           | -5.324543               | 0.000000  | -4.107433 |
| 7             | 5             | 0           | -4.107433               | -5.324543 | 0.000000  |
| 8             | 5             | 0           | -5.324543               | -4.107433 | 0.000000  |
| 9             | 5             | 0           | -6.556530               | -1.197189 | -2.419731 |
| 10            | 5             | 0           | -6.556530               | -2.419731 | -1.197189 |
| 11            | 5             | 0           | -6.556530               | 1.197189  | -2.419731 |
| 12            | 5             | 0           | -6.556530               | 2.419731  | -1.197189 |
| 13            | 5             | 0           | -6.556530               | -2.419731 | 1.197189  |
| 14            | 5             | 0           | -6.556530               | -1.197189 | 2.419731  |
| 15            | 5             | 0           | -6.556530               | 2.419731  | 1.197189  |
| 16            | 5             | 0           | -6.556530               | 1.197189  | 2.419731  |
| 17            | 8             | 0           | -7.134675               | -2.038643 | 0.000000  |
| 18            | 8             | 0           | -5.742142               | -3.538340 | -1.194278 |
| 19            | 8             | 0           | -5.742142               | -3.538340 | 1.194278  |
| 20            | 8             | 0           | -7.134675               | 0.000000  | -2.038643 |
| 21            | 8             | 0           | -5.742142               | 1.194278  | -3.538340 |
| 22            | 8             | 0           | -5.742142               | -1.194278 | -3.538340 |
| 23            | 8             | 0           | -7.134675               | 2.038643  | 0.000000  |
| 24            | 8             | 0           | -5.742142               | 3.538340  | -1.194278 |
| 25            | 8             | 0           | -5.742142               | 3.538340  | 1.194278  |
| 26            | 8             | 0           | -7.134675               | 0.000000  | 2.038643  |
| 27            | 8             | 0           | -5.742142               | -1.194278 | 3.538340  |
| 28            | 8             | 0           | -5.742142               | 1.194278  | 3.538340  |
| 29            | 5             | 0           | 5.324543                | 0.000000  | -4.107433 |
| 30            | 5             | 0           | 4.107433                | 0.000000  | -5.324543 |
| 31            | 5             | 0           | 5.324543                | 4.107433  | 0.000000  |
| 32            | 5             | 0           | 4.107433                | 5.324543  | 0.000000  |
| 33            | 5             | 0           | 5.324543                | 0.000000  | 4.107433  |
| 34            | 5             | 0           | 4.107433                | 0.000000  | 5.324543  |
| 35            | 5             | 0           | 6.556530                | 1.197189  | -2.419731 |
| 36            | 5             | 0           | 6.556530                | 2.419731  | -1.197189 |
| 37            | 5             | 0           | 6.556530                | 2.419731  | 1.197189  |
| 38            | 5             | 0           | 6.556530                | 1.197189  | 2.419731  |
| 39            | 5             | 0           | 6.556530                | -1.197189 | 2.419731  |
| 40            | 5             | 0           | 6.556530                | -2.419731 | 1.197189  |
| 41            | 5             | 0           | 6.556530                | -2.419731 | -1.197189 |
| 42            | 5             | 0           | 6.556530                | -1.197189 | -2.419731 |
| 43            | 5             | 0           | 5.324543                | -4.107433 | 0.000000  |
| 44            | 5             | 0           | 4.107433                | -5.324543 | 0.000000  |
| 45            | 8             | 0           | 7.134675                | 0.000000  | 2.038643  |
| 46            | 8             | 0           | 5.742142                | 1.194278  | 3.538340  |
| 47            | 8             | 0           | 5.742142                | -1.194278 | 3.538340  |
| 48            | 8             | 0           | 7.134675                | 2.038643  | 0.000000  |
| 49            | 8             | 0           | 5.742142                | 3.538340  | 1.194278  |
| 50            | 8             | 0           | 5.742142                | 3.538340  | -1.194278 |
| 51            | 8             | 0           | 7.134675                | 0.000000  | -2.038643 |

|     |   |   |           |           |           |
|-----|---|---|-----------|-----------|-----------|
| 52  | 8 | 0 | 5.742142  | 1.194278  | -3.538340 |
| 53  | 8 | 0 | 5.742142  | -1.194278 | -3.538340 |
| 54  | 8 | 0 | 7.134675  | -2.038643 | 0.000000  |
| 55  | 8 | 0 | 5.742142  | -3.538340 | -1.194278 |
| 56  | 8 | 0 | 5.742142  | -3.538340 | 1.194278  |
| 57  | 5 | 0 | 0.000000  | -5.324543 | 4.107433  |
| 58  | 5 | 0 | 0.000000  | -4.107433 | 5.324543  |
| 59  | 5 | 0 | 0.000000  | 5.324543  | 4.107433  |
| 60  | 5 | 0 | 0.000000  | 4.107433  | 5.324543  |
| 61  | 5 | 0 | 2.419731  | 1.197189  | 6.556530  |
| 62  | 5 | 0 | 1.197189  | 2.419731  | 6.556530  |
| 63  | 5 | 0 | -2.419731 | 1.197189  | 6.556530  |
| 64  | 5 | 0 | -1.197189 | 2.419731  | 6.556530  |
| 65  | 5 | 0 | -1.197189 | -2.419731 | 6.556530  |
| 66  | 5 | 0 | -2.419731 | -1.197189 | 6.556530  |
| 67  | 5 | 0 | 1.197189  | -2.419731 | 6.556530  |
| 68  | 5 | 0 | 2.419731  | -1.197189 | 6.556530  |
| 69  | 8 | 0 | 0.000000  | -2.038643 | 7.134675  |
| 70  | 8 | 0 | 1.194278  | -3.538340 | 5.742142  |
| 71  | 8 | 0 | -1.194278 | -3.538340 | 5.742142  |
| 72  | 8 | 0 | -2.038643 | 0.000000  | 7.134675  |
| 73  | 8 | 0 | -3.538340 | -1.194278 | 5.742142  |
| 74  | 8 | 0 | -3.538340 | 1.194278  | 5.742142  |
| 75  | 8 | 0 | 0.000000  | 2.038643  | 7.134675  |
| 76  | 8 | 0 | -1.194278 | 3.538340  | 5.742142  |
| 77  | 8 | 0 | 1.194278  | 3.538340  | 5.742142  |
| 78  | 8 | 0 | 2.038643  | 0.000000  | 7.134675  |
| 79  | 8 | 0 | 3.538340  | 1.194278  | 5.742142  |
| 80  | 8 | 0 | 3.538340  | -1.194278 | 5.742142  |
| 81  | 5 | 0 | 0.000000  | 4.107433  | -5.324543 |
| 82  | 5 | 0 | 0.000000  | 5.324543  | -4.107433 |
| 83  | 5 | 0 | -2.419731 | 6.556530  | 1.197189  |
| 84  | 5 | 0 | -1.197189 | 6.556530  | 2.419731  |
| 85  | 5 | 0 | 1.197189  | 6.556530  | 2.419731  |
| 86  | 5 | 0 | 2.419731  | 6.556530  | 1.197189  |
| 87  | 5 | 0 | 2.419731  | 6.556530  | -1.197189 |
| 88  | 5 | 0 | 1.197189  | 6.556530  | -2.419731 |
| 89  | 5 | 0 | -1.197189 | 6.556530  | -2.419731 |
| 90  | 5 | 0 | -2.419731 | 6.556530  | -1.197189 |
| 91  | 8 | 0 | 2.038643  | 7.134675  | 0.000000  |
| 92  | 8 | 0 | 3.538340  | 5.742142  | -1.194278 |
| 93  | 8 | 0 | 3.538340  | 5.742142  | 1.194278  |
| 94  | 8 | 0 | 0.000000  | 7.134675  | 2.038643  |
| 95  | 8 | 0 | 1.194278  | 5.742142  | 3.538340  |
| 96  | 8 | 0 | -1.194278 | 5.742142  | 3.538340  |
| 97  | 8 | 0 | -2.038643 | 7.134675  | 0.000000  |
| 98  | 8 | 0 | -3.538340 | 5.742142  | 1.194278  |
| 99  | 8 | 0 | -3.538340 | 5.742142  | -1.194278 |
| 100 | 8 | 0 | 0.000000  | 7.134675  | -2.038643 |
| 101 | 8 | 0 | -1.194278 | 5.742142  | -3.538340 |
| 102 | 8 | 0 | 1.194278  | 5.742142  | -3.538340 |
| 103 | 5 | 0 | 0.000000  | -5.324543 | -4.107433 |
| 104 | 5 | 0 | 0.000000  | -4.107433 | -5.324543 |
| 105 | 5 | 0 | -1.197189 | -2.419731 | -6.556530 |
| 106 | 5 | 0 | -2.419731 | -1.197189 | -6.556530 |
| 107 | 5 | 0 | 2.419731  | 1.197189  | -6.556530 |
| 108 | 5 | 0 | 1.197189  | 2.419731  | -6.556530 |
| 109 | 5 | 0 | -2.419731 | 1.197189  | -6.556530 |



|     |   |   |           |           |           |
|-----|---|---|-----------|-----------|-----------|
| 110 | 5 | 0 | -1.197189 | 2.419731  | -6.556530 |
| 111 | 5 | 0 | 1.197189  | -2.419731 | -6.556530 |
| 112 | 5 | 0 | 2.419731  | -1.197189 | -6.556530 |
| 113 | 8 | 0 | 0.000000  | 2.038643  | -7.134675 |
| 114 | 8 | 0 | 1.194278  | 3.538340  | -5.742142 |
| 115 | 8 | 0 | -1.194278 | 3.538340  | -5.742142 |
| 116 | 8 | 0 | -2.038643 | 0.000000  | -7.134675 |
| 117 | 8 | 0 | -3.538340 | 1.194278  | -5.742142 |
| 118 | 8 | 0 | -3.538340 | -1.194278 | -5.742142 |
| 119 | 8 | 0 | 0.000000  | -2.038643 | -7.134675 |
| 120 | 8 | 0 | -1.194278 | -3.538340 | -5.742142 |
| 121 | 8 | 0 | 1.194278  | -3.538340 | -5.742142 |
| 122 | 8 | 0 | 2.038643  | 0.000000  | -7.134675 |
| 123 | 8 | 0 | 3.538340  | -1.194278 | -5.742142 |
| 124 | 8 | 0 | 3.538340  | 1.194278  | -5.742142 |
| 125 | 5 | 0 | 2.419731  | -6.556530 | 1.197189  |
| 126 | 5 | 0 | 1.197189  | -6.556530 | 2.419731  |
| 127 | 5 | 0 | -1.197189 | -6.556530 | -2.419731 |
| 128 | 5 | 0 | -2.419731 | -6.556530 | -1.197189 |
| 129 | 5 | 0 | 2.419731  | -6.556530 | -1.197189 |
| 130 | 5 | 0 | 1.197189  | -6.556530 | -2.419731 |
| 131 | 5 | 0 | -1.197189 | -6.556530 | 2.419731  |
| 132 | 5 | 0 | -2.419731 | -6.556530 | 1.197189  |
| 133 | 8 | 0 | 0.000000  | -7.134675 | 2.038643  |
| 134 | 8 | 0 | -1.194278 | -5.742142 | 3.538340  |
| 135 | 8 | 0 | 1.194278  | -5.742142 | 3.538340  |
| 136 | 8 | 0 | 3.538340  | -5.742142 | 1.194278  |
| 137 | 8 | 0 | 2.038643  | -7.134675 | 0.000000  |
| 138 | 8 | 0 | 3.538340  | -5.742142 | -1.194278 |
| 139 | 8 | 0 | 0.000000  | -7.134675 | -2.038643 |
| 140 | 8 | 0 | 1.194278  | -5.742142 | -3.538340 |
| 141 | 8 | 0 | -1.194278 | -5.742142 | -3.538340 |
| 142 | 8 | 0 | -2.038643 | -7.134675 | 0.000000  |
| 143 | 8 | 0 | -3.538340 | -5.742142 | -1.194278 |
| 144 | 8 | 0 | -3.538340 | -5.742142 | 1.194278  |

-----  
SCF Done: E(RB3LYP) = -7213.57604891

**Table S11:** Theoretical Cartesian coordinates for *t*-**B**<sub>27</sub>.

| Center Number | Atomic Number | Atomic Type | Coordinates (Angstroms) |           |           |
|---------------|---------------|-------------|-------------------------|-----------|-----------|
|               |               |             | X                       | Y         | Z         |
| 1             | 5             | 0           | -3.516638               | 1.037024  | -5.162021 |
| 2             | 5             | 0           | -2.656408               | 2.526986  | -5.162021 |
| 3             | 5             | 0           | 2.656408                | 2.526986  | -5.162021 |
| 4             | 5             | 0           | 3.516638                | 1.037024  | -5.162021 |
| 5             | 5             | 0           | 0.000000                | 5.054110  | -0.859278 |
| 6             | 5             | 0           | 0.000000                | 5.054110  | 0.859278  |
| 7             | 5             | 0           | -0.868495               | 3.827929  | -6.083610 |
| 8             | 5             | 0           | 0.868495                | 3.827929  | -6.083610 |
| 9             | 5             | 0           | -2.029267               | 4.651279  | -4.242534 |
| 10            | 5             | 0           | -1.167413               | 5.380719  | -2.917467 |
| 11            | 5             | 0           | 1.167413                | 5.380719  | -2.917467 |
| 12            | 5             | 0           | 2.029267                | 4.651279  | -4.242534 |
| 13            | 8             | 0           | 1.193749                | 5.048793  | -1.574929 |
| 14            | 8             | 0           | 0.000000                | 5.972010  | -3.379303 |
| 15            | 8             | 0           | -1.193749               | 5.048793  | -1.574929 |
| 16            | 8             | 0           | -1.422341               | 4.934669  | -5.458944 |
| 17            | 8             | 0           | -1.629933               | 2.673080  | -6.086838 |
| 18            | 8             | 0           | -2.799533               | 3.500359  | -4.177846 |
| 19            | 8             | 0           | 1.422341                | 4.934669  | -5.458944 |
| 20            | 8             | 0           | 2.799533                | 3.500359  | -4.177846 |
| 21            | 8             | 0           | 1.629933                | 2.673080  | -6.086838 |
| 22            | 5             | 0           | 4.376988                | -2.527055 | -0.859278 |
| 23            | 5             | 0           | 4.376988                | -2.527055 | 0.859278  |
| 24            | 5             | 0           | 0.860230                | -3.564010 | -5.162021 |
| 25            | 5             | 0           | -0.860230               | -3.564010 | -5.162021 |
| 26            | 5             | 0           | 3.749331                | -1.161826 | -6.083610 |
| 27            | 5             | 0           | 2.880836                | -2.666103 | -6.083610 |
| 28            | 5             | 0           | 5.042759                | -0.568242 | -4.242534 |
| 29            | 5             | 0           | 5.243546                | -1.679350 | -2.917467 |
| 30            | 5             | 0           | 4.076133                | -3.701369 | -2.917467 |
| 31            | 5             | 0           | 3.013492                | -4.083036 | -4.242534 |
| 32            | 8             | 0           | 5.171913                | -2.986005 | -3.379303 |
| 33            | 8             | 0           | 4.969258                | -1.490579 | -1.574929 |
| 34            | 8             | 0           | 3.775509                | -3.558214 | -1.574929 |
| 35            | 8             | 0           | 3.129922                | 0.075023  | -6.086838 |
| 36            | 8             | 0           | 4.431167                | 0.674287  | -4.177846 |
| 37            | 8             | 0           | 4.984719                | -1.235551 | -5.458944 |
| 38            | 8             | 0           | 3.562378                | -3.699118 | -5.458944 |
| 39            | 8             | 0           | 1.631634                | -4.174646 | -4.177846 |
| 40            | 8             | 0           | 1.499989                | -2.748103 | -6.086838 |
| 41            | 5             | 0           | -2.880836               | -2.666103 | -6.083610 |
| 42            | 5             | 0           | -3.749331               | -1.161826 | -6.083610 |
| 43            | 5             | 0           | -3.013492               | -4.083036 | -4.242534 |
| 44            | 5             | 0           | -4.076133               | -3.701369 | -2.917467 |
| 45            | 5             | 0           | -5.243546               | -1.679350 | -2.917467 |
| 46            | 5             | 0           | -5.042759               | -0.568242 | -4.242534 |
| 47            | 5             | 0           | -4.376988               | -2.527055 | -0.859278 |
| 48            | 5             | 0           | -4.376988               | -2.527055 | 0.859278  |
| 49            | 8             | 0           | -5.171913               | -2.986005 | -3.379303 |
| 50            | 8             | 0           | -3.775509               | -3.558214 | -1.574929 |
| 51            | 8             | 0           | -4.969258               | -1.490579 | -1.574929 |
| 52            | 8             | 0           | -3.562378               | -3.699118 | -5.458944 |

|     |   |   |           |           |           |
|-----|---|---|-----------|-----------|-----------|
| 53  | 8 | 0 | -1.499989 | -2.748103 | -6.086838 |
| 54  | 8 | 0 | -1.631634 | -4.174646 | -4.177846 |
| 55  | 8 | 0 | -4.984719 | -1.235551 | -5.458944 |
| 56  | 8 | 0 | -4.431167 | 0.674287  | -4.177846 |
| 57  | 8 | 0 | -3.129922 | 0.075023  | -6.086838 |
| 58  | 5 | 0 | 3.516638  | 1.037024  | 5.162021  |
| 59  | 5 | 0 | 2.656408  | 2.526986  | 5.162021  |
| 60  | 5 | 0 | 0.860230  | -3.564010 | 5.162021  |
| 61  | 5 | 0 | -0.860230 | -3.564010 | 5.162021  |
| 62  | 5 | 0 | -2.656408 | 2.526986  | 5.162021  |
| 63  | 5 | 0 | -3.516638 | 1.037024  | 5.162021  |
| 64  | 5 | 0 | 2.029267  | 4.651279  | 4.242534  |
| 65  | 5 | 0 | 1.167413  | 5.380719  | 2.917467  |
| 66  | 5 | 0 | -1.167413 | 5.380719  | 2.917467  |
| 67  | 5 | 0 | -2.029267 | 4.651279  | 4.242534  |
| 68  | 5 | 0 | 0.868495  | 3.827929  | 6.083610  |
| 69  | 5 | 0 | -0.868495 | 3.827929  | 6.083610  |
| 70  | 8 | 0 | 0.000000  | 5.972010  | 3.379303  |
| 71  | 8 | 0 | 1.193749  | 5.048793  | 1.574929  |
| 72  | 8 | 0 | -1.193749 | 5.048793  | 1.574929  |
| 73  | 8 | 0 | 1.422341  | 4.934669  | 5.458944  |
| 74  | 8 | 0 | 1.629933  | 2.673080  | 6.086838  |
| 75  | 8 | 0 | 2.799533  | 3.500359  | 4.177846  |
| 76  | 8 | 0 | -1.422341 | 4.934669  | 5.458944  |
| 77  | 8 | 0 | -2.799533 | 3.500359  | 4.177846  |
| 78  | 8 | 0 | -1.629933 | 2.673080  | 6.086838  |
| 79  | 5 | 0 | -3.749331 | -1.161826 | 6.083610  |
| 80  | 5 | 0 | -2.880836 | -2.666103 | 6.083610  |
| 81  | 5 | 0 | -5.042759 | -0.568242 | 4.242534  |
| 82  | 5 | 0 | -5.243546 | -1.679350 | 2.917467  |
| 83  | 5 | 0 | -4.076133 | -3.701369 | 2.917467  |
| 84  | 5 | 0 | -3.013492 | -4.083036 | 4.242534  |
| 85  | 8 | 0 | -5.171913 | -2.986005 | 3.379303  |
| 86  | 8 | 0 | -4.969258 | -1.490579 | 1.574929  |
| 87  | 8 | 0 | -3.775509 | -3.558214 | 1.574929  |
| 88  | 8 | 0 | -4.984719 | -1.235551 | 5.458944  |
| 89  | 8 | 0 | -3.129922 | 0.075023  | 6.086838  |
| 90  | 8 | 0 | -4.431167 | 0.674287  | 4.177846  |
| 91  | 8 | 0 | -3.562378 | -3.699118 | 5.458944  |
| 92  | 8 | 0 | -1.631634 | -4.174646 | 4.177846  |
| 93  | 8 | 0 | -1.499989 | -2.748103 | 6.086838  |
| 94  | 5 | 0 | 2.880836  | -2.666103 | 6.083610  |
| 95  | 5 | 0 | 3.749331  | -1.161826 | 6.083610  |
| 96  | 5 | 0 | 3.013492  | -4.083036 | 4.242534  |
| 97  | 5 | 0 | 4.076133  | -3.701369 | 2.917467  |
| 98  | 5 | 0 | 5.243546  | -1.679350 | 2.917467  |
| 99  | 5 | 0 | 5.042759  | -0.568242 | 4.242534  |
| 100 | 8 | 0 | 5.171913  | -2.986005 | 3.379303  |
| 101 | 8 | 0 | 3.775509  | -3.558214 | 1.574929  |
| 102 | 8 | 0 | 4.969258  | -1.490579 | 1.574929  |
| 103 | 8 | 0 | 3.562378  | -3.699118 | 5.458944  |
| 104 | 8 | 0 | 1.499989  | -2.748103 | 6.086838  |
| 105 | 8 | 0 | 1.631634  | -4.174646 | 4.177846  |
| 106 | 8 | 0 | 4.984719  | -1.235551 | 5.458944  |
| 107 | 8 | 0 | 4.431167  | 0.674287  | 4.177846  |
| 108 | 8 | 0 | 3.129922  | 0.075023  | 6.086838  |

SCF Done: E(RB3LYP) = -5409.84449056

-----

**Table S12:** Theoretical Cartesian coordinates for *t*-**B**<sub>45</sub>.

Standard orientation:

| Center<br>Number | Atomic<br>Number | Atomic<br>Type | Coordinates (Angstroms) |           |           |
|------------------|------------------|----------------|-------------------------|-----------|-----------|
|                  |                  |                | X                       | Y         | Z         |
| 1                | 5                | 0              | 4.295171                | 4.449266  | 4.637952  |
| 2                | 5                | 0              | 2.904223                | 5.459849  | 4.637952  |
| 3                | 5                | 0              | -2.904223               | 5.459849  | 4.637952  |
| 4                | 5                | 0              | -4.295171               | 4.449266  | 4.637952  |
| 5                | 5                | 0              | 0.000000                | 8.488925  | 0.859368  |
| 6                | 5                | 0              | 0.000000                | 8.488925  | -0.859368 |
| 7                | 5                | 0              | 0.872314                | 6.256158  | 5.604566  |
| 8                | 5                | 0              | -0.872314               | 6.256158  | 5.604566  |
| 9                | 5                | 0              | 2.027352                | 7.616404  | 4.103644  |
| 10               | 5                | 0              | 1.161629                | 8.584456  | 2.949341  |
| 11               | 5                | 0              | -1.161629               | 8.584456  | 2.949341  |
| 12               | 5                | 0              | -2.027352               | 7.616404  | 4.103644  |
| 13               | 8                | 0              | 0.000000                | 9.116963  | 3.489866  |
| 14               | 8                | 0              | 1.192538                | 8.436402  | 1.573191  |
| 15               | 8                | 0              | -1.192538               | 8.436402  | 1.573191  |
| 16               | 8                | 0              | 1.339467                | 7.528393  | 5.304926  |
| 17               | 8                | 0              | 1.756720                | 5.212182  | 5.386132  |
| 18               | 8                | 0              | 2.932656                | 6.604559  | 3.847016  |
| 19               | 8                | 0              | -1.339467               | 7.528393  | 5.304926  |
| 20               | 8                | 0              | -2.932656               | 6.604559  | 3.847016  |
| 21               | 8                | 0              | -1.756720               | 5.212182  | 5.386132  |
| 22               | 5                | 0              | -6.090079               | -1.074894 | 4.637952  |
| 23               | 5                | 0              | -5.558784               | -2.710052 | 4.637952  |
| 24               | 5                | 0              | -8.073448               | 2.623222  | 0.859368  |
| 25               | 5                | 0              | -8.073448               | 2.623222  | -0.859368 |
| 26               | 5                | 0              | -5.680400               | 2.762879  | 5.604566  |
| 27               | 5                | 0              | -6.219520               | 1.103639  | 5.604566  |
| 28               | 5                | 0              | -6.617145               | 4.281725  | 4.103644  |
| 29               | 5                | 0              | -7.805340               | 3.757517  | 2.949341  |
| 30               | 5                | 0              | -8.523266               | 1.547968  | 2.949341  |
| 31               | 5                | 0              | -7.870117               | 0.425472  | 4.103644  |
| 32               | 8                | 0              | -8.670747               | 2.817297  | 3.489866  |
| 33               | 8                | 0              | -7.654980               | 3.741163  | 1.573191  |
| 34               | 8                | 0              | -8.392010               | 1.472820  | 1.573191  |
| 35               | 8                | 0              | -6.746009               | 3.600310  | 5.304926  |
| 36               | 8                | 0              | -4.414223               | 3.281393  | 5.386132  |
| 37               | 8                | 0              | -5.375069               | 4.830043  | 3.847016  |
| 38               | 8                | 0              | -7.573845               | 1.052492  | 5.304926  |
| 39               | 8                | 0              | -7.187550               | -0.748201 | 3.847016  |
| 40               | 8                | 0              | -5.499936               | -0.060087 | 5.386132  |
| 41               | 5                | 0              | -0.859653               | -6.124170 | 4.637952  |
| 42               | 5                | 0              | 0.859653                | -6.124170 | 4.637952  |
| 43               | 5                | 0              | -4.989665               | -6.867685 | 0.859368  |
| 44               | 5                | 0              | -4.989665               | -6.867685 | -0.859368 |
| 45               | 5                | 0              | -4.382994               | -4.548605 | 5.604566  |
| 46               | 5                | 0              | -2.971561               | -5.574071 | 5.604566  |
| 47               | 5                | 0              | -6.116972               | -4.970153 | 4.103644  |
| 48               | 5                | 0              | -5.985594               | -6.262183 | 2.949341  |
| 49               | 5                | 0              | -4.106039               | -7.627759 | 2.949341  |
| 50               | 5                | 0              | -2.836648               | -7.353448 | 4.103644  |
| 51               | 8                | 0              | -5.358816               | -7.375778 | 3.489866  |

|     |   |   |           |           |           |
|-----|---|---|-----------|-----------|-----------|
| 52  | 8 | 0 | -5.923576 | -6.124236 | 1.573191  |
| 53  | 8 | 0 | -3.994009 | -7.526149 | 1.573191  |
| 54  | 8 | 0 | -5.508730 | -5.303279 | 5.304926  |
| 55  | 8 | 0 | -4.484860 | -3.184170 | 5.386132  |
| 56  | 8 | 0 | -6.254631 | -3.619429 | 3.847016  |
| 57  | 8 | 0 | -3.341427 | -6.877917 | 5.304926  |
| 58  | 8 | 0 | -1.509494 | -7.066973 | 3.847016  |
| 59  | 8 | 0 | -1.642427 | -5.249318 | 5.386132  |
| 60  | 5 | 0 | 5.558784  | -2.710052 | 4.637952  |
| 61  | 5 | 0 | 6.090079  | -1.074894 | 4.637952  |
| 62  | 5 | 0 | 4.989665  | -6.867685 | 0.859368  |
| 63  | 5 | 0 | 4.989665  | -6.867685 | -0.859368 |
| 64  | 5 | 0 | 2.971561  | -5.574071 | 5.604566  |
| 65  | 5 | 0 | 4.382994  | -4.548605 | 5.604566  |
| 66  | 5 | 0 | 2.836648  | -7.353448 | 4.103644  |
| 67  | 5 | 0 | 4.106039  | -7.627759 | 2.949341  |
| 68  | 5 | 0 | 5.985594  | -6.262183 | 2.949341  |
| 69  | 5 | 0 | 6.116972  | -4.970153 | 4.103644  |
| 70  | 8 | 0 | 5.358816  | -7.375778 | 3.489866  |
| 71  | 8 | 0 | 3.994009  | -7.526149 | 1.573191  |
| 72  | 8 | 0 | 5.923576  | -6.124236 | 1.573191  |
| 73  | 8 | 0 | 3.341427  | -6.877917 | 5.304926  |
| 74  | 8 | 0 | 1.642427  | -5.249318 | 5.386132  |
| 75  | 8 | 0 | 1.509494  | -7.066973 | 3.847016  |
| 76  | 8 | 0 | 5.508730  | -5.303279 | 5.304926  |
| 77  | 8 | 0 | 6.254631  | -3.619429 | 3.847016  |
| 78  | 8 | 0 | 4.484860  | -3.184170 | 5.386132  |
| 79  | 5 | 0 | 6.219520  | 1.103639  | 5.604566  |
| 80  | 5 | 0 | 5.680400  | 2.762879  | 5.604566  |
| 81  | 5 | 0 | 7.870117  | 0.425472  | 4.103644  |
| 82  | 5 | 0 | 8.523266  | 1.547968  | 2.949341  |
| 83  | 5 | 0 | 7.805340  | 3.757517  | 2.949341  |
| 84  | 5 | 0 | 6.617145  | 4.281725  | 4.103644  |
| 85  | 5 | 0 | 8.073448  | 2.623222  | 0.859368  |
| 86  | 5 | 0 | 8.073448  | 2.623222  | -0.859368 |
| 87  | 8 | 0 | 8.670747  | 2.817297  | 3.489866  |
| 88  | 8 | 0 | 8.392010  | 1.472820  | 1.573191  |
| 89  | 8 | 0 | 7.654980  | 3.741163  | 1.573191  |
| 90  | 8 | 0 | 7.573845  | 1.052492  | 5.304926  |
| 91  | 8 | 0 | 5.499936  | -0.060087 | 5.386132  |
| 92  | 8 | 0 | 7.187550  | -0.748201 | 3.847016  |
| 93  | 5 | 0 | -4.295171 | 4.449266  | -4.637952 |
| 94  | 5 | 0 | -2.904223 | 5.459849  | -4.637952 |
| 95  | 5 | 0 | 2.904223  | 5.459849  | -4.637952 |
| 96  | 5 | 0 | 4.295171  | 4.449266  | -4.637952 |
| 97  | 5 | 0 | -0.872314 | 6.256158  | -5.604566 |
| 98  | 5 | 0 | 0.872314  | 6.256158  | -5.604566 |
| 99  | 5 | 0 | -2.027352 | 7.616404  | -4.103644 |
| 100 | 5 | 0 | -1.161629 | 8.584456  | -2.949341 |
| 101 | 5 | 0 | 1.161629  | 8.584456  | -2.949341 |
| 102 | 5 | 0 | 2.027352  | 7.616404  | -4.103644 |
| 103 | 8 | 0 | 0.000000  | 9.116963  | -3.489866 |
| 104 | 8 | 0 | -1.192538 | 8.436402  | -1.573191 |
| 105 | 8 | 0 | 1.192538  | 8.436402  | -1.573191 |
| 106 | 8 | 0 | -1.339467 | 7.528393  | -5.304926 |
| 107 | 8 | 0 | -1.756720 | 5.212182  | -5.386132 |
| 108 | 8 | 0 | -2.932656 | 6.604559  | -3.847016 |
| 109 | 8 | 0 | 1.339467  | 7.528393  | -5.304926 |

|     |   |   |           |           |           |
|-----|---|---|-----------|-----------|-----------|
| 110 | 8 | 0 | 2.932656  | 6.604559  | -3.847016 |
| 111 | 8 | 0 | 1.756720  | 5.212182  | -5.386132 |
| 112 | 5 | 0 | 6.090079  | -1.074894 | -4.637952 |
| 113 | 5 | 0 | 5.558784  | -2.710052 | -4.637952 |
| 114 | 5 | 0 | 5.680400  | 2.762879  | -5.604566 |
| 115 | 5 | 0 | 6.219520  | 1.103639  | -5.604566 |
| 116 | 5 | 0 | 6.617145  | 4.281725  | -4.103644 |
| 117 | 5 | 0 | 7.805340  | 3.757517  | -2.949341 |
| 118 | 5 | 0 | 8.523266  | 1.547968  | -2.949341 |
| 119 | 5 | 0 | 7.870117  | 0.425472  | -4.103644 |
| 120 | 8 | 0 | 8.670747  | 2.817297  | -3.489866 |
| 121 | 8 | 0 | 7.654980  | 3.741163  | -1.573191 |
| 122 | 8 | 0 | 8.392010  | 1.472820  | -1.573191 |
| 123 | 8 | 0 | 6.746009  | 3.600310  | -5.304926 |
| 124 | 8 | 0 | 4.414223  | 3.281393  | -5.386132 |
| 125 | 8 | 0 | 5.375069  | 4.830043  | -3.847016 |
| 126 | 8 | 0 | 7.573845  | 1.052492  | -5.304926 |
| 127 | 8 | 0 | 7.187550  | -0.748201 | -3.847016 |
| 128 | 8 | 0 | 5.499936  | -0.060087 | -5.386132 |
| 129 | 5 | 0 | 0.859653  | -6.124170 | -4.637952 |
| 130 | 5 | 0 | -0.859653 | -6.124170 | -4.637952 |
| 131 | 5 | 0 | 4.382994  | -4.548605 | -5.604566 |
| 132 | 5 | 0 | 2.971561  | -5.574071 | -5.604566 |
| 133 | 5 | 0 | 6.116972  | -4.970153 | -4.103644 |
| 134 | 5 | 0 | 5.985594  | -6.262183 | -2.949341 |
| 135 | 5 | 0 | 4.106039  | -7.627759 | -2.949341 |
| 136 | 5 | 0 | 2.836648  | -7.353448 | -4.103644 |
| 137 | 8 | 0 | 5.358816  | -7.375778 | -3.489866 |
| 138 | 8 | 0 | 5.923576  | -6.124236 | -1.573191 |
| 139 | 8 | 0 | 3.994009  | -7.526149 | -1.573191 |
| 140 | 8 | 0 | 4.484860  | -3.184170 | -5.386132 |
| 141 | 8 | 0 | 6.254631  | -3.619429 | -3.847016 |
| 142 | 8 | 0 | 5.508730  | -5.303279 | -5.304926 |
| 143 | 8 | 0 | 3.341427  | -6.877917 | -5.304926 |
| 144 | 8 | 0 | 1.509494  | -7.066973 | -3.847016 |
| 145 | 8 | 0 | 1.642427  | -5.249318 | -5.386132 |
| 146 | 5 | 0 | -5.558784 | -2.710052 | -4.637952 |
| 147 | 5 | 0 | -6.090079 | -1.074894 | -4.637952 |
| 148 | 5 | 0 | -2.971561 | -5.574071 | -5.604566 |
| 149 | 5 | 0 | -4.382994 | -4.548605 | -5.604566 |
| 150 | 5 | 0 | -2.836648 | -7.353448 | -4.103644 |
| 151 | 5 | 0 | -4.106039 | -7.627759 | -2.949341 |
| 152 | 5 | 0 | -5.985594 | -6.262183 | -2.949341 |
| 153 | 5 | 0 | -6.116972 | -4.970153 | -4.103644 |
| 154 | 8 | 0 | -5.358816 | -7.375778 | -3.489866 |
| 155 | 8 | 0 | -3.994009 | -7.526149 | -1.573191 |
| 156 | 8 | 0 | -5.923576 | -6.124236 | -1.573191 |
| 157 | 8 | 0 | -3.341427 | -6.877917 | -5.304926 |
| 158 | 8 | 0 | -1.642427 | -5.249318 | -5.386132 |
| 159 | 8 | 0 | -1.509494 | -7.066973 | -3.847016 |
| 160 | 8 | 0 | -5.508730 | -5.303279 | -5.304926 |
| 161 | 8 | 0 | -6.254631 | -3.619429 | -3.847016 |
| 162 | 8 | 0 | -4.484860 | -3.184170 | -5.386132 |
| 163 | 5 | 0 | -6.219520 | 1.103639  | -5.604566 |
| 164 | 5 | 0 | -5.680400 | 2.762879  | -5.604566 |
| 165 | 5 | 0 | -7.870117 | 0.425472  | -4.103644 |
| 166 | 5 | 0 | -8.523266 | 1.547968  | -2.949341 |
| 167 | 5 | 0 | -7.805340 | 3.757517  | -2.949341 |

|     |   |   |           |           |           |
|-----|---|---|-----------|-----------|-----------|
| 168 | 5 | 0 | -6.617145 | 4.281725  | -4.103644 |
| 169 | 8 | 0 | -8.670747 | 2.817297  | -3.489866 |
| 170 | 8 | 0 | -8.392010 | 1.472820  | -1.573191 |
| 171 | 8 | 0 | -7.654980 | 3.741163  | -1.573191 |
| 172 | 8 | 0 | -7.573845 | 1.052492  | -5.304926 |
| 173 | 8 | 0 | -5.499936 | -0.060087 | -5.386132 |
| 174 | 8 | 0 | -7.187550 | -0.748201 | -3.847016 |
| 175 | 8 | 0 | -6.746009 | 3.600310  | -5.304926 |
| 176 | 8 | 0 | -5.375069 | 4.830043  | -3.847016 |
| 177 | 8 | 0 | -4.414223 | 3.281393  | -5.386132 |
| 178 | 8 | 0 | 6.746009  | 3.600310  | 5.304926  |
| 179 | 8 | 0 | 5.375069  | 4.830043  | 3.847016  |
| 180 | 8 | 0 | 4.414223  | 3.281393  | 5.386132  |

-----  
SCF Done: E(RB3LYP) = -9016.43867671

**Table S13:** Theoretical Cartesian coordinates for  $t\text{-B}_{54}$ .

Standard orientation:

| Center<br>Number | Atomic<br>Number | Atomic<br>Type | Coordinates (Angstroms) |            |           |
|------------------|------------------|----------------|-------------------------|------------|-----------|
|                  |                  |                | X                       | Y          | Z         |
| 1                | 5                | 0              | 2.941948                | 6.817145   | 4.494700  |
| 2                | 5                | 0              | 0.000000                | 9.986954   | 0.859423  |
| 3                | 5                | 0              | -2.941948               | 6.817145   | 4.494700  |
| 4                | 5                | 0              | -8.648956               | 4.993477   | 0.859423  |
| 5                | 5                | 0              | -8.648956               | 4.993477   | -0.859423 |
| 6                | 5                | 0              | -7.374795               | 0.860771   | 4.494700  |
| 7                | 5                | 0              | -7.374795               | -0.860771  | 4.494700  |
| 8                | 5                | 0              | -4.432847               | 5.956375   | 4.494700  |
| 9                | 5                | 0              | -6.060957               | 4.509507   | 5.462132  |
| 10               | 5                | 0              | -6.935826               | 2.994189   | 5.462132  |
| 11               | 5                | 0              | -6.762177               | 6.231972   | 4.051657  |
| 12               | 5                | 0              | -8.087465               | 6.007313   | 2.953488  |
| 13               | 5                | 0              | -9.246218               | 4.000294   | 2.953488  |
| 14               | 5                | 0              | -8.778134               | 2.740231   | 4.051657  |
| 15               | 8                | 0              | -9.113056               | 5.261426   | 3.516272  |
| 16               | 8                | 0              | -7.994073               | 5.992145   | 1.572072  |
| 17               | 8                | 0              | -9.186386               | 3.926998   | 1.572072  |
| 18               | 8                | 0              | -6.960288               | 5.543435   | 5.239320  |
| 19               | 8                | 0              | -4.728319               | 4.794720   | 5.203190  |
| 20               | 8                | 0              | -5.452056               | 6.534632   | 3.742664  |
| 21               | 8                | 0              | -8.280899               | 3.256068   | 5.239320  |
| 22               | 8                | 0              | -8.385185               | 1.454303   | 3.742664  |
| 23               | 8                | 0              | -6.516509               | 1.697485   | 5.203190  |
| 24               | 5                | 0              | -4.432847               | -5.956375  | 4.494700  |
| 25               | 5                | 0              | -2.941948               | -6.817145  | 4.494700  |
| 26               | 5                | 0              | -8.648956               | -4.993477  | -0.859423 |
| 27               | 5                | 0              | -8.648956               | -4.993477  | 0.859423  |
| 28               | 5                | 0              | -6.935826               | -2.994189  | 5.462132  |
| 29               | 5                | 0              | -6.060957               | -4.509507  | 5.462132  |
| 30               | 5                | 0              | -8.778134               | -2.740231  | 4.051657  |
| 31               | 5                | 0              | -9.246218               | -4.000294  | 2.953488  |
| 32               | 5                | 0              | -8.087465               | -6.007313  | 2.953488  |
| 33               | 5                | 0              | -6.762177               | -6.231972  | 4.051657  |
| 34               | 8                | 0              | -9.113056               | -5.261426  | 3.516272  |
| 35               | 8                | 0              | -9.186386               | -3.926998  | 1.572072  |
| 36               | 8                | 0              | -7.994073               | -5.992145  | 1.572072  |
| 37               | 8                | 0              | -8.280899               | -3.256068  | 5.239320  |
| 38               | 8                | 0              | -6.516509               | -1.697485  | 5.203190  |
| 39               | 8                | 0              | -8.385185               | -1.454303  | 3.742664  |
| 40               | 8                | 0              | -6.960288               | -5.543435  | 5.239320  |
| 41               | 8                | 0              | -5.452056               | -6.534632  | 3.742664  |
| 42               | 8                | 0              | -4.728319               | -4.794720  | 5.203190  |
| 43               | 5                | 0              | 2.941948                | -6.817145  | 4.494700  |
| 44               | 5                | 0              | 4.432847                | -5.956375  | 4.494700  |
| 45               | 5                | 0              | 0.000000                | -9.986954  | 0.859423  |
| 46               | 5                | 0              | 0.000000                | -9.986954  | -0.859423 |
| 47               | 5                | 0              | -0.874869               | -7.503696  | 5.462132  |
| 48               | 5                | 0              | 0.874869                | -7.503696  | 5.462132  |
| 49               | 5                | 0              | -2.015957               | -8.972203  | 4.051657  |
| 50               | 5                | 0              | -1.158753               | -10.007607 | 2.953488  |
| 51               | 5                | 0              | 1.158753                | -10.007607 | 2.953488  |



|     |   |   |           |            |           |
|-----|---|---|-----------|------------|-----------|
| 52  | 5 | 0 | 2.015957  | -8.972203  | 4.051657  |
| 53  | 8 | 0 | 0.000000  | -10.522851 | 3.516272  |
| 54  | 8 | 0 | -1.192313 | -9.919143  | 1.572072  |
| 55  | 8 | 0 | 1.192313  | -9.919143  | 1.572072  |
| 56  | 8 | 0 | -1.320612 | -8.799503  | 5.239320  |
| 57  | 8 | 0 | -1.788190 | -6.492205  | 5.203190  |
| 58  | 8 | 0 | -2.933130 | -7.988935  | 3.742664  |
| 59  | 8 | 0 | 1.320612  | -8.799503  | 5.239320  |
| 60  | 8 | 0 | 2.933130  | -7.988935  | 3.742664  |
| 61  | 8 | 0 | 1.788190  | -6.492205  | 5.203190  |
| 62  | 5 | 0 | 6.060957  | -4.509507  | 5.462132  |
| 63  | 5 | 0 | 6.935826  | -2.994189  | 5.462132  |
| 64  | 5 | 0 | 6.762177  | -6.231972  | 4.051657  |
| 65  | 5 | 0 | 8.087465  | -6.007313  | 2.953488  |
| 66  | 5 | 0 | 9.246218  | -4.000294  | 2.953488  |
| 67  | 5 | 0 | 8.778134  | -2.740231  | 4.051657  |
| 68  | 5 | 0 | 7.374795  | -0.860771  | 4.494700  |
| 69  | 5 | 0 | 7.374795  | 0.860771   | 4.494700  |
| 70  | 5 | 0 | 8.648956  | -4.993477  | 0.859423  |
| 71  | 5 | 0 | 8.648956  | -4.993477  | -0.859423 |
| 72  | 8 | 0 | 9.113056  | -5.261426  | 3.516272  |
| 73  | 8 | 0 | 7.994073  | -5.992145  | 1.572072  |
| 74  | 8 | 0 | 9.186386  | -3.926998  | 1.572072  |
| 75  | 8 | 0 | 6.960288  | -5.543435  | 5.239320  |
| 76  | 8 | 0 | 4.728319  | -4.794720  | 5.203190  |
| 77  | 8 | 0 | 5.452056  | -6.534632  | 3.742664  |
| 78  | 8 | 0 | 8.280899  | -3.256068  | 5.239320  |
| 79  | 8 | 0 | 8.385185  | -1.454303  | 3.742664  |
| 80  | 8 | 0 | 6.516509  | -1.697485  | 5.203190  |
| 81  | 5 | 0 | 4.432847  | 5.956375   | 4.494700  |
| 82  | 5 | 0 | 8.648956  | 4.993477   | 0.859423  |
| 83  | 5 | 0 | 8.648956  | 4.993477   | -0.859423 |
| 84  | 5 | 0 | 6.935826  | 2.994189   | 5.462132  |
| 85  | 5 | 0 | 6.060957  | 4.509507   | 5.462132  |
| 86  | 5 | 0 | 8.778134  | 2.740231   | 4.051657  |
| 87  | 5 | 0 | 9.246218  | 4.000294   | 2.953488  |
| 88  | 5 | 0 | 8.087465  | 6.007313   | 2.953488  |
| 89  | 5 | 0 | 6.762177  | 6.231972   | 4.051657  |
| 90  | 8 | 0 | 9.113056  | 5.261426   | 3.516272  |
| 91  | 8 | 0 | 9.186386  | 3.926998   | 1.572072  |
| 92  | 8 | 0 | 7.994073  | 5.992145   | 1.572072  |
| 93  | 8 | 0 | 8.280899  | 3.256068   | 5.239320  |
| 94  | 8 | 0 | 6.516509  | 1.697485   | 5.203190  |
| 95  | 8 | 0 | 8.385185  | 1.454303   | 3.742664  |
| 96  | 8 | 0 | 6.960288  | 5.543435   | 5.239320  |
| 97  | 8 | 0 | 5.452056  | 6.534632   | 3.742664  |
| 98  | 8 | 0 | 4.728319  | 4.794720   | 5.203190  |
| 99  | 5 | 0 | 0.000000  | 9.986954   | -0.859423 |
| 100 | 5 | 0 | -4.432847 | 5.956375   | -4.494700 |
| 101 | 5 | 0 | -2.941948 | 6.817145   | -4.494700 |
| 102 | 5 | 0 | 2.941948  | 6.817145   | -4.494700 |
| 103 | 5 | 0 | 4.432847  | 5.956375   | -4.494700 |
| 104 | 5 | 0 | -2.015957 | 8.972203   | -4.051657 |
| 105 | 5 | 0 | -1.158753 | 10.007607  | -2.953488 |
| 106 | 5 | 0 | 1.158753  | 10.007607  | -2.953488 |
| 107 | 5 | 0 | 2.015957  | 8.972203   | -4.051657 |
| 108 | 5 | 0 | -0.874869 | 7.503696   | -5.462132 |
| 109 | 5 | 0 | 0.874869  | 7.503696   | -5.462132 |

|     |   |   |           |            |           |
|-----|---|---|-----------|------------|-----------|
| 110 | 8 | 0 | 0.000000  | 10.522851  | -3.516272 |
| 111 | 8 | 0 | -1.192313 | 9.919143   | -1.572072 |
| 112 | 8 | 0 | 1.192313  | 9.919143   | -1.572072 |
| 113 | 8 | 0 | -1.320612 | 8.799503   | -5.239320 |
| 114 | 8 | 0 | -1.788190 | 6.492205   | -5.203190 |
| 115 | 8 | 0 | -2.933130 | 7.988935   | -3.742664 |
| 116 | 8 | 0 | 1.320612  | 8.799503   | -5.239320 |
| 117 | 8 | 0 | 2.933130  | 7.988935   | -3.742664 |
| 118 | 8 | 0 | 1.788190  | 6.492205   | -5.203190 |
| 119 | 5 | 0 | 7.374795  | 0.860771   | -4.494700 |
| 120 | 5 | 0 | 7.374795  | -0.860771  | -4.494700 |
| 121 | 5 | 0 | 6.060957  | 4.509507   | -5.462132 |
| 122 | 5 | 0 | 6.935826  | 2.994189   | -5.462132 |
| 123 | 5 | 0 | 6.762177  | 6.231972   | -4.051657 |
| 124 | 5 | 0 | 8.087465  | 6.007313   | -2.953488 |
| 125 | 5 | 0 | 9.246218  | 4.000294   | -2.953488 |
| 126 | 5 | 0 | 8.778134  | 2.740231   | -4.051657 |
| 127 | 8 | 0 | 9.113056  | 5.261426   | -3.516272 |
| 128 | 8 | 0 | 7.994073  | 5.992145   | -1.572072 |
| 129 | 8 | 0 | 9.186386  | 3.926998   | -1.572072 |
| 130 | 8 | 0 | 6.960288  | 5.543435   | -5.239320 |
| 131 | 8 | 0 | 4.728319  | 4.794720   | -5.203190 |
| 132 | 8 | 0 | 5.452056  | 6.534632   | -3.742664 |
| 133 | 8 | 0 | 8.280899  | 3.256068   | -5.239320 |
| 134 | 8 | 0 | 8.385185  | 1.454303   | -3.742664 |
| 135 | 8 | 0 | 6.516509  | 1.697485   | -5.203190 |
| 136 | 5 | 0 | 4.432847  | -5.956375  | -4.494700 |
| 137 | 5 | 0 | 2.941948  | -6.817145  | -4.494700 |
| 138 | 5 | 0 | -2.941948 | -6.817145  | -4.494700 |
| 139 | 5 | 0 | -4.432847 | -5.956375  | -4.494700 |
| 140 | 5 | 0 | 0.874869  | -7.503696  | -5.462132 |
| 141 | 5 | 0 | -0.874869 | -7.503696  | -5.462132 |
| 142 | 5 | 0 | 2.015957  | -8.972203  | -4.051657 |
| 143 | 5 | 0 | 1.158753  | -10.007607 | -2.953488 |
| 144 | 5 | 0 | -1.158753 | -10.007607 | -2.953488 |
| 145 | 5 | 0 | -2.015957 | -8.972203  | -4.051657 |
| 146 | 8 | 0 | 0.000000  | -10.522851 | -3.516272 |
| 147 | 8 | 0 | 1.192313  | -9.919143  | -1.572072 |
| 148 | 8 | 0 | -1.192313 | -9.919143  | -1.572072 |
| 149 | 8 | 0 | 1.320612  | -8.799503  | -5.239320 |
| 150 | 8 | 0 | 1.788190  | -6.492205  | -5.203190 |
| 151 | 8 | 0 | 2.933130  | -7.988935  | -3.742664 |
| 152 | 8 | 0 | -1.320612 | -8.799503  | -5.239320 |
| 153 | 8 | 0 | -2.933130 | -7.988935  | -3.742664 |
| 154 | 8 | 0 | -1.788190 | -6.492205  | -5.203190 |
| 155 | 5 | 0 | -7.374795 | -0.860771  | -4.494700 |
| 156 | 5 | 0 | -7.374795 | 0.860771   | -4.494700 |
| 157 | 5 | 0 | -6.060957 | -4.509507  | -5.462132 |
| 158 | 5 | 0 | -6.935826 | -2.994189  | -5.462132 |
| 159 | 5 | 0 | -6.762177 | -6.231972  | -4.051657 |
| 160 | 5 | 0 | -8.087465 | -6.007313  | -2.953488 |
| 161 | 5 | 0 | -9.246218 | -4.000294  | -2.953488 |
| 162 | 5 | 0 | -8.778134 | -2.740231  | -4.051657 |
| 163 | 8 | 0 | -9.113056 | -5.261426  | -3.516272 |
| 164 | 8 | 0 | -7.994073 | -5.992145  | -1.572072 |
| 165 | 8 | 0 | -9.186386 | -3.926998  | -1.572072 |
| 166 | 8 | 0 | -6.960288 | -5.543435  | -5.239320 |
| 167 | 8 | 0 | -4.728319 | -4.794720  | -5.203190 |

|     |   |   |           |           |           |
|-----|---|---|-----------|-----------|-----------|
| 168 | 8 | 0 | -5.452056 | -6.534632 | -3.742664 |
| 169 | 8 | 0 | -8.280899 | -3.256068 | -5.239320 |
| 170 | 8 | 0 | -8.385185 | -1.454303 | -3.742664 |
| 171 | 8 | 0 | -6.516509 | -1.697485 | -5.203190 |
| 172 | 5 | 0 | -6.935826 | 2.994189  | -5.462132 |
| 173 | 5 | 0 | -6.060957 | 4.509507  | -5.462132 |
| 174 | 5 | 0 | -8.778134 | 2.740231  | -4.051657 |
| 175 | 5 | 0 | -9.246218 | 4.000294  | -2.953488 |
| 176 | 5 | 0 | -8.087465 | 6.007313  | -2.953488 |
| 177 | 5 | 0 | -6.762177 | 6.231972  | -4.051657 |
| 178 | 8 | 0 | -9.113056 | 5.261426  | -3.516272 |
| 179 | 8 | 0 | -9.186386 | 3.926998  | -1.572072 |
| 180 | 8 | 0 | -7.994073 | 5.992145  | -1.572072 |
| 181 | 8 | 0 | -8.280899 | 3.256068  | -5.239320 |
| 182 | 8 | 0 | -6.516509 | 1.697485  | -5.203190 |
| 183 | 8 | 0 | -8.385185 | 1.454303  | -3.742664 |
| 184 | 8 | 0 | -6.960288 | 5.543435  | -5.239320 |
| 185 | 8 | 0 | -5.452056 | 6.534632  | -3.742664 |
| 186 | 8 | 0 | -4.728319 | 4.794720  | -5.203190 |
| 187 | 5 | 0 | 6.935826  | -2.994189 | -5.462132 |
| 188 | 5 | 0 | 6.060957  | -4.509507 | -5.462132 |
| 189 | 5 | 0 | 8.778134  | -2.740231 | -4.051657 |
| 190 | 5 | 0 | 9.246218  | -4.000294 | -2.953488 |
| 191 | 5 | 0 | 8.087465  | -6.007313 | -2.953488 |
| 192 | 5 | 0 | 6.762177  | -6.231972 | -4.051657 |
| 193 | 8 | 0 | 9.113056  | -5.261426 | -3.516272 |
| 194 | 8 | 0 | 9.186386  | -3.926998 | -1.572072 |
| 195 | 8 | 0 | 7.994073  | -5.992145 | -1.572072 |
| 196 | 8 | 0 | 8.280899  | -3.256068 | -5.239320 |
| 197 | 8 | 0 | 6.516509  | -1.697485 | -5.203190 |
| 198 | 8 | 0 | 8.385185  | -1.454303 | -3.742664 |
| 199 | 8 | 0 | 6.960288  | -5.543435 | -5.239320 |
| 200 | 8 | 0 | 5.452056  | -6.534632 | -3.742664 |
| 201 | 8 | 0 | 4.728319  | -4.794720 | -5.203190 |
| 202 | 5 | 0 | 0.874869  | 7.503696  | 5.462132  |
| 203 | 5 | 0 | -0.874869 | 7.503696  | 5.462132  |
| 204 | 5 | 0 | 2.015957  | 8.972203  | 4.051657  |
| 205 | 5 | 0 | 1.158753  | 10.007607 | 2.953488  |
| 206 | 5 | 0 | -1.158753 | 10.007607 | 2.953488  |
| 207 | 5 | 0 | -2.015957 | 8.972203  | 4.051657  |
| 208 | 8 | 0 | 0.000000  | 10.522851 | 3.516272  |
| 209 | 8 | 0 | 1.192313  | 9.919143  | 1.572072  |
| 210 | 8 | 0 | -1.192313 | 9.919143  | 1.572072  |
| 211 | 8 | 0 | 1.320612  | 8.799503  | 5.239320  |
| 212 | 8 | 0 | 1.788190  | 6.492205  | 5.203190  |
| 213 | 8 | 0 | 2.933130  | 7.988935  | 3.742664  |
| 214 | 8 | 0 | -1.320612 | 8.799503  | 5.239320  |
| 215 | 8 | 0 | -2.933130 | 7.988935  | 3.742664  |
| 216 | 8 | 0 | -1.788190 | 6.492205  | 5.203190  |

-----  
SCF Done: E(RB3LYP) = -10819.6977504

**Table S14:** Theoretical Cartesian coordinates for  $t\text{-B}_{90}$ .

Standard orientation:

| Center<br>Number | Atomic<br>Number | Atomic<br>Type | Coordinates (Angstroms) |            |           |
|------------------|------------------|----------------|-------------------------|------------|-----------|
|                  |                  |                | X                       | Y          | Z         |
| 1                | 8                | 0              | 5.461228                | 7.830306   | 7.057878  |
| 2                | 8                | 0              | 7.060811                | 6.086813   | 7.352653  |
| 3                | 8                | 0              | 4.245435                | 3.288765   | 10.591891 |
| 4                | 8                | 0              | 5.647820                | 5.158758   | 10.834175 |
| 5                | 8                | 0              | 6.337753                | 3.387533   | 9.452268  |
| 6                | 8                | 0              | 3.834809                | 7.134167   | 10.498851 |
| 7                | 8                | 0              | 1.899085                | 5.844600   | 10.163609 |
| 8                | 8                | 0              | 2.391860                | 7.682951   | 8.727220  |
| 9                | 8                | 0              | 8.017669                | -2.616974  | 8.365155  |
| 10               | 8                | 0              | 6.846980                | -4.687785  | 8.526531  |
| 11               | 8                | 0              | 7.397265                | -3.475266  | 10.462992 |
| 12               | 8                | 0              | 3.782559                | -4.831238  | 10.195259 |
| 13               | 8                | 0              | 5.022804                | -3.587496  | 11.756515 |
| 14               | 8                | 0              | 2.865394                | -2.859854  | 11.174405 |
| 15               | 8                | 0              | 4.589085                | 0.173537   | 10.952311 |
| 16               | 8                | 0              | 6.680778                | 0.272313   | 9.811961  |
| 17               | 8                | 0              | -2.484596               | -7.989017  | 10.309306 |
| 18               | 8                | 0              | -1.170475               | -8.341303  | 8.393165  |
| 19               | 8                | 0              | -3.500723               | -7.876559  | 8.193375  |
| 20               | 8                | 0              | -3.520031               | -5.753686  | 11.429047 |
| 21               | 8                | 0              | -4.835025               | -4.988539  | 9.638080  |
| 22               | 8                | 0              | -3.418060               | -3.484163  | 10.827557 |
| 23               | 8                | 0              | -0.002372               | -4.168798  | 11.128813 |
| 24               | 8                | 0              | 0.910423                | -6.138373  | 10.141768 |
| 25               | 8                | 0              | -9.416512               | -1.426815  | 7.100991  |
| 26               | 8                | 0              | -9.776700               | -0.051862  | 8.972346  |
| 27               | 8                | 0              | -9.684947               | 0.928246   | 6.838620  |
| 28               | 8                | 0              | -7.604294               | 3.125642   | 8.582471  |
| 29               | 8                | 0              | -5.920718               | 2.271497   | 10.038871 |
| 30               | 8                | 0              | -7.871503               | -1.016891  | 10.623922 |
| 31               | 8                | 0              | -5.534941               | -1.179396  | 10.437027 |
| 32               | 8                | 0              | -6.951302               | -2.681730  | 9.244091  |
| 33               | 8                | 0              | -4.406657               | 9.365726   | 8.287591  |
| 34               | 8                | 0              | -5.309208               | 8.559665   | 6.273238  |
| 35               | 8                | 0              | -3.143496               | 9.556859   | 6.315426  |
| 36               | 8                | 0              | -2.506737               | 8.400275   | 9.953773  |
| 37               | 8                | 0              | -0.690512               | 8.303514   | 8.465541  |
| 38               | 8                | 0              | -1.182894               | 6.459387   | 9.894833  |
| 39               | 8                | 0              | -4.362710               | 5.005801   | 9.844255  |
| 40               | 8                | 0              | -6.034802               | 5.855824   | 8.372000  |
| 41               | 5                | 0              | 0.237082                | -7.219400  | -9.212057 |
| 42               | 5                | 0              | -1.442051               | -6.882755  | -9.356366 |
| 43               | 8                | 0              | 2.094692                | -11.688807 | -0.448144 |
| 44               | 8                | 0              | 3.208766                | -11.340988 | 1.631508  |
| 45               | 8                | 0              | 6.697915                | -11.463575 | -0.037506 |
| 46               | 8                | 0              | 6.390027                | -9.892426  | 1.682646  |
| 47               | 8                | 0              | 7.443670                | -9.258507  | -0.360343 |
| 48               | 8                | 0              | 5.434394                | -11.865212 | -2.394080 |
| 49               | 8                | 0              | 5.814886                | -9.780302  | -3.408875 |
| 50               | 8                | 0              | 3.643430                | -10.765328 | -3.444984 |
| 51               | 8                | 0              | 2.506737                | -8.400275  | -9.953773 |

|     |   |   |            |           |            |
|-----|---|---|------------|-----------|------------|
| 52  | 8 | 0 | 1.182895   | -6.459387 | -9.894833  |
| 53  | 8 | 0 | 0.690513   | -8.303513 | -8.465541  |
| 54  | 8 | 0 | 4.406657   | -9.365725 | -8.287591  |
| 55  | 8 | 0 | 3.143496   | -9.556859 | -6.315426  |
| 56  | 8 | 0 | 5.309209   | -8.559665 | -6.273238  |
| 57  | 8 | 0 | 6.034803   | -5.855824 | -8.372000  |
| 58  | 8 | 0 | 4.362711   | -5.005801 | -9.844255  |
| 59  | 8 | 0 | 7.871503   | 1.016891  | -10.623921 |
| 60  | 8 | 0 | 6.951302   | 2.681730  | -9.244090  |
| 61  | 8 | 0 | 5.534941   | 1.179396  | -10.437026 |
| 62  | 8 | 0 | 8.170217   | -1.654367 | -10.325635 |
| 63  | 8 | 0 | 5.920718   | -2.271497 | -10.038871 |
| 64  | 8 | 0 | 7.604294   | -3.125642 | -8.582471  |
| 65  | 8 | 0 | 9.684948   | -0.928246 | -6.838619  |
| 66  | 8 | 0 | 9.416512   | 1.426815  | -7.100990  |
| 67  | 8 | 0 | 12.950008  | 2.646422  | -1.160137  |
| 68  | 8 | 0 | 11.449394  | 3.088374  | 0.593486   |
| 69  | 8 | 0 | 11.079462  | 4.007162  | -1.575643  |
| 70  | 8 | 0 | 12.808784  | 1.013032  | -3.311776  |
| 71  | 8 | 0 | 10.898783  | 1.898802  | -4.355527  |
| 72  | 8 | 0 | 11.146907  | -0.457475 | -4.085030  |
| 73  | 8 | 0 | 11.698449  | -1.805690 | -0.904291  |
| 74  | 8 | 0 | 11.820010  | -0.365583 | 0.992536   |
| 75  | 8 | 0 | 10.697397  | -5.741625 | 5.356081   |
| 76  | 8 | 0 | 8.449795   | -5.787311 | 6.040682   |
| 77  | 8 | 0 | 9.625265   | -3.718503 | 5.885258   |
| 78  | 8 | 0 | 11.892002  | -5.031651 | 3.036471   |
| 79  | 8 | 0 | 11.168387  | -2.800891 | 2.886091   |
| 80  | 8 | 0 | 11.044265  | -4.243126 | 0.991479   |
| 81  | 8 | 0 | 9.316332   | -7.273813 | 1.216443   |
| 82  | 8 | 0 | 8.265973   | -7.903407 | 3.262544   |
| 83  | 5 | 0 | -5.539593  | -0.926517 | -10.268255 |
| 84  | 5 | 0 | -5.352654  | -2.623647 | -10.072232 |
| 85  | 8 | 0 | -6.680778  | -0.272313 | -9.811961  |
| 86  | 8 | 0 | -6.356234  | 1.243610  | -11.577595 |
| 87  | 8 | 0 | -4.589085  | -0.173537 | -10.952311 |
| 88  | 8 | 0 | -5.022804  | 3.587496  | -11.756514 |
| 89  | 8 | 0 | -2.865394  | 2.859854  | -11.174404 |
| 90  | 8 | 0 | -3.782559  | 4.831238  | -10.195258 |
| 91  | 8 | 0 | -6.846980  | 4.687785  | -8.526530  |
| 92  | 8 | 0 | -8.017669  | 2.616974  | -8.365155  |
| 93  | 8 | 0 | -11.892003 | 5.031651  | -3.036471  |
| 94  | 8 | 0 | -11.044266 | 4.243126  | -0.991478  |
| 95  | 8 | 0 | -11.168388 | 2.800891  | -2.886090  |
| 96  | 8 | 0 | -10.697397 | 5.741624  | -5.356081  |
| 97  | 8 | 0 | -9.625266  | 3.718502  | -5.885258  |
| 98  | 8 | 0 | -8.449796  | 5.787311  | -6.040682  |
| 99  | 8 | 0 | -8.265974  | 7.903407  | -3.262544  |
| 100 | 8 | 0 | -9.316333  | 7.273813  | -1.216443  |
| 101 | 8 | 0 | -5.434393  | 11.865211 | 2.394080   |
| 102 | 8 | 0 | -3.643430  | 10.765328 | 3.444983   |
| 103 | 8 | 0 | -5.814885  | 9.780301  | 3.408875   |
| 104 | 8 | 0 | -7.443670  | 9.258507  | 0.360343   |
| 105 | 8 | 0 | -6.390027  | 9.892426  | -1.682646  |
| 106 | 8 | 0 | -4.237205  | 12.580764 | 0.079478   |
| 107 | 8 | 0 | -3.208766  | 11.340987 | -1.631508  |
| 108 | 8 | 0 | -2.094692  | 11.688807 | 0.448144   |
| 109 | 8 | 0 | 4.096649   | 12.308765 | -2.791620  |

|     |   |   |            |            |            |
|-----|---|---|------------|------------|------------|
| 110 | 8 | 0 | 5.306290   | 10.300069  | -2.636754  |
| 111 | 8 | 0 | 4.088677   | 11.127115  | -0.760641  |
| 112 | 8 | 0 | 0.673665   | 11.821597  | -1.056344  |
| 113 | 8 | 0 | -0.438235  | 11.467884  | -3.135972  |
| 114 | 8 | 0 | 2.838101   | 11.907933  | -5.147450  |
| 115 | 8 | 0 | 1.341484   | 10.253978  | -5.886984  |
| 116 | 8 | 0 | 3.668812   | 9.775959   | -5.683547  |
| 117 | 8 | 0 | 10.468472  | 8.003599   | 1.526295   |
| 118 | 8 | 0 | 9.866881   | 6.608957   | -0.266693  |
| 119 | 8 | 0 | 10.247370  | 5.694504   | 1.902319   |
| 120 | 8 | 0 | 9.087971   | 8.945676   | 3.650553   |
| 121 | 8 | 0 | 8.460328   | 6.913128   | 4.649017   |
| 122 | 8 | 0 | 6.864928   | 8.661260   | 4.357578   |
| 123 | 8 | 0 | 6.306349   | 9.999104   | 1.177154   |
| 124 | 8 | 0 | 7.522436   | 9.166517   | -0.697376  |
| 125 | 8 | 0 | 0.880610   | 6.283586   | -11.656036 |
| 126 | 8 | 0 | -0.910423  | 6.138373   | -10.141768 |
| 127 | 8 | 0 | 0.002372   | 4.168798   | -11.128812 |
| 128 | 8 | 0 | 3.520031   | 5.753686   | -11.429047 |
| 129 | 8 | 0 | 3.418060   | 3.484163   | -10.827556 |
| 130 | 8 | 0 | 4.835025   | 4.988539   | -9.638080  |
| 131 | 8 | 0 | 3.500724   | 7.876560   | -8.193375  |
| 132 | 8 | 0 | 1.170476   | 8.341303   | -8.393165  |
| 133 | 8 | 0 | -13.231412 | 0.025336   | 0.855028   |
| 134 | 8 | 0 | -11.820011 | 0.365583   | -0.992536  |
| 135 | 8 | 0 | -11.698449 | 1.805690   | 0.904291   |
| 136 | 8 | 0 | -12.808784 | -1.013032  | 3.311776   |
| 137 | 8 | 0 | -11.146907 | 0.457475   | 4.085031   |
| 138 | 8 | 0 | -10.898782 | -1.898802  | 4.355527   |
| 139 | 8 | 0 | -11.079462 | -4.007162  | 1.575643   |
| 140 | 8 | 0 | -11.449394 | -3.088374  | -0.593486  |
| 141 | 5 | 0 | -4.360880  | -4.640679  | -10.863635 |
| 142 | 5 | 0 | -3.192931  | -5.913170  | -10.649366 |
| 143 | 8 | 0 | -2.391860  | -7.682950  | -8.727219  |
| 144 | 8 | 0 | -1.899085  | -5.844600  | -10.163609 |
| 145 | 8 | 0 | -5.647820  | -5.158758  | -10.834175 |
| 146 | 8 | 0 | -4.245435  | -3.288765  | -10.591891 |
| 147 | 8 | 0 | -6.337753  | -3.387533  | -9.452268  |
| 148 | 8 | 0 | -7.060812  | -6.086814  | -7.352653  |
| 149 | 8 | 0 | -6.206574  | -7.247534  | -9.208842  |
| 150 | 8 | 0 | -5.461228  | -7.830306  | -7.057878  |
| 151 | 8 | 0 | -2.838101  | -11.907932 | 5.147449   |
| 152 | 8 | 0 | -3.668812  | -9.775959  | 5.683546   |
| 153 | 8 | 0 | -1.341484  | -10.253978 | 5.886984   |
| 154 | 8 | 0 | 0.438235   | -11.467884 | 3.135972   |
| 155 | 8 | 0 | -0.673665  | -11.821597 | 1.056343   |
| 156 | 8 | 0 | -4.096649  | -12.308764 | 2.791620   |
| 157 | 8 | 0 | -4.088677  | -11.127115 | 0.760641   |
| 158 | 8 | 0 | -5.306290  | -10.300068 | 2.636754   |
| 159 | 8 | 0 | -10.247371 | -5.694504  | -1.902320  |
| 160 | 8 | 0 | -9.866881  | -6.608957  | 0.266693   |
| 161 | 8 | 0 | -10.468472 | -8.003599  | -1.526296  |
| 162 | 8 | 0 | -7.522436  | -9.166516  | 0.697376   |
| 163 | 8 | 0 | -6.306349  | -9.999104  | -1.177155  |
| 164 | 8 | 0 | -9.087971  | -8.945676  | -3.650554  |
| 165 | 8 | 0 | -6.864929  | -8.661260  | -4.357579  |
| 166 | 8 | 0 | -8.460328  | -6.913128  | -4.649018  |
| 167 | 5 | 0 | -6.764758  | -6.081515  | -8.704474  |

|     |   |   |            |            |           |
|-----|---|---|------------|------------|-----------|
| 168 | 5 | 0 | -6.404879  | -4.737301  | -9.750201 |
| 169 | 5 | 0 | -5.201624  | -7.783800  | -8.416238 |
| 170 | 5 | 0 | -3.674056  | -7.710367  | -9.246957 |
| 171 | 5 | 0 | -6.558554  | -7.124415  | -6.572063 |
| 172 | 5 | 0 | -7.322121  | -7.576002  | -5.100102 |
| 173 | 5 | 0 | -7.752111  | -9.290393  | -3.502088 |
| 174 | 5 | 0 | -9.311665  | -7.583257  | -3.788085 |
| 175 | 5 | 0 | -10.201228 | -6.976670  | -2.420612 |
| 176 | 5 | 0 | -9.829091  | -7.869950  | -0.302058 |
| 177 | 5 | 0 | -8.662105  | -9.143512  | -0.087265 |
| 178 | 5 | 0 | -7.474024  | -9.957117  | -1.918548 |
| 179 | 5 | 0 | -6.391808  | -9.808343  | 0.199277  |
| 180 | 5 | 0 | -5.184268  | -10.424729 | 1.255489  |
| 181 | 5 | 0 | -10.299164 | -5.544151  | -0.519167 |
| 182 | 5 | 0 | -10.956827 | -4.125577  | 0.193884  |
| 183 | 5 | 0 | -12.029069 | -3.134065  | 2.076556  |
| 184 | 5 | 0 | -11.938502 | -2.083240  | 3.461167  |
| 185 | 5 | 0 | -12.180735 | 0.218986   | 3.196711  |
| 186 | 5 | 0 | -12.454440 | 0.889103   | 1.613690  |
| 187 | 5 | 0 | -12.573899 | -0.517422  | -0.239660 |
| 188 | 5 | 0 | -12.390697 | -2.236997  | -0.042041 |
| 189 | 5 | 0 | -10.656717 | -0.612254  | 4.829197  |
| 190 | 5 | 0 | -9.854896  | -0.355458  | 6.327361  |
| 191 | 5 | 0 | -8.022220  | -1.852047  | 9.526052  |
| 192 | 5 | 0 | -9.249195  | -1.228692  | 8.460296  |
| 193 | 5 | 0 | -9.510271  | 1.072214   | 8.203729  |
| 194 | 5 | 0 | -8.474888  | 2.168323   | 9.073153  |
| 195 | 5 | 0 | -6.830594  | 1.334609   | 10.496315 |
| 196 | 5 | 0 | -6.638500  | -0.384225  | 10.691444 |
| 197 | 5 | 0 | -5.745074  | -2.445780  | 9.898082  |
| 198 | 5 | 0 | -4.592110  | -3.702126  | 10.111785 |
| 199 | 5 | 0 | -6.388656  | 3.308070   | 9.235915  |
| 200 | 5 | 0 | -5.536421  | 4.796351   | 9.125335  |
| 201 | 5 | 0 | -2.414049  | 7.031628   | 10.162831 |
| 202 | 5 | 0 | -3.996770  | 6.308004   | 10.135728 |
| 203 | 5 | 0 | -1.932721  | 8.833668   | 8.767058  |
| 204 | 5 | 0 | -3.154933  | 9.456729   | 7.695550  |
| 205 | 5 | 0 | -5.271093  | 8.484023   | 7.654468  |
| 206 | 5 | 0 | -5.631094  | 7.138603   | 8.698324  |
| 207 | 5 | 0 | -4.326788  | 9.304694   | 5.626551  |
| 208 | 5 | 0 | -4.600701  | 9.966238   | 4.064265  |
| 209 | 5 | 0 | -0.237082  | 7.219401   | 9.212058  |
| 210 | 5 | 0 | 1.442052   | 6.882756   | 9.356367  |
| 211 | 5 | 0 | 3.674057   | 7.710368   | 9.246957  |
| 212 | 5 | 0 | 5.201625   | 7.783800   | 8.416238  |
| 213 | 5 | 0 | 4.360881   | 4.640680   | 10.863635 |
| 214 | 5 | 0 | 3.192931   | 5.913170   | 10.649367 |
| 215 | 5 | 0 | 6.404879   | 4.737301   | 9.750200  |
| 216 | 5 | 0 | 6.764758   | 6.081515   | 8.704473  |
| 217 | 5 | 0 | 6.558554   | 7.124415   | 6.572062  |
| 218 | 5 | 0 | 7.322121   | 7.576001   | 5.100102  |
| 219 | 5 | 0 | 5.352654   | 2.623647   | 10.072232 |
| 220 | 5 | 0 | 5.539593   | 0.926517   | 10.268255 |
| 221 | 5 | 0 | 7.030791   | -0.926915  | 10.407010 |
| 222 | 5 | 0 | 7.698359   | -2.364455  | 9.687743  |
| 223 | 5 | 0 | 6.552683   | -4.386376  | 9.844645  |
| 224 | 5 | 0 | 5.025372   | -4.458162  | 10.676156 |
| 225 | 5 | 0 | 4.129028   | -2.533065  | 11.634098 |

|     |   |   |           |            |            |
|-----|---|---|-----------|------------|------------|
| 226 | 5 | 0 | 4.987458  | -1.023201  | 11.521520  |
| 227 | 5 | 0 | 2.665363  | -4.130112  | 10.640804  |
| 228 | 5 | 0 | 1.101730  | -4.842660  | 10.613812  |
| 229 | 5 | 0 | -1.088456 | -4.915921  | 11.549501  |
| 230 | 5 | 0 | -2.788686 | -4.574659  | 11.401521  |
| 231 | 5 | 0 | -0.196746 | -6.840395  | 10.584746  |
| 232 | 5 | 0 | -1.231482 | -7.937554  | 9.715388   |
| 233 | 5 | 0 | -2.365949 | -8.515344  | 7.700997   |
| 234 | 5 | 0 | -3.507530 | -7.482839  | 9.519944   |
| 235 | 5 | 0 | -4.172765 | -6.044326  | 10.239601  |
| 236 | 5 | 0 | -2.458397 | -9.553876  | 6.334802   |
| 237 | 5 | 0 | -1.543098 | -11.409602 | 5.152898   |
| 238 | 5 | 0 | -3.816895 | -10.943214 | 4.955264   |
| 239 | 5 | 0 | -4.630085 | -11.203065 | 3.438205   |
| 240 | 5 | 0 | -3.442020 | -12.012601 | 1.604668   |
| 241 | 5 | 0 | -1.742679 | -12.359326 | 1.751305   |
| 242 | 5 | 0 | -0.656221 | -12.014611 | 3.782701   |
| 243 | 5 | 0 | 0.508973  | -11.579779 | 1.750064   |
| 244 | 5 | 0 | 2.017819  | -11.509267 | 0.930375   |
| 245 | 5 | 0 | 4.382437  | -11.779589 | 1.044098   |
| 246 | 5 | 0 | 5.966780  | -11.059003 | 1.070306   |
| 247 | 5 | 0 | 6.997245  | -10.440146 | -0.925397  |
| 248 | 5 | 0 | 6.185377  | -10.699404 | -2.443026  |
| 249 | 5 | 0 | 4.064398  | -11.661621 | -2.478366  |
| 250 | 5 | 0 | 3.293421  | -12.121727 | -0.987108  |
| 251 | 5 | 0 | 7.319077  | -9.097485  | 1.016887   |
| 252 | 5 | 0 | 8.340186  | -8.015103  | 1.876752   |
| 253 | 5 | 0 | 4.600701  | -9.966239  | -4.064266  |
| 254 | 5 | 0 | 4.326789  | -9.304694  | -5.626551  |
| 255 | 5 | 0 | 3.154933  | -9.456728  | -7.695550  |
| 256 | 5 | 0 | 1.932721  | -8.833668  | -8.767058  |
| 257 | 5 | 0 | 5.271093  | -8.484023  | -7.654468  |
| 258 | 5 | 0 | 5.631094  | -7.138603  | -8.698324  |
| 259 | 5 | 0 | 3.996771  | -6.308003  | -10.135728 |
| 260 | 5 | 0 | 2.414050  | -7.031627  | -10.162830 |
| 261 | 5 | 0 | 5.536421  | -4.796351  | -9.125334  |
| 262 | 5 | 0 | 6.388657  | -3.308070  | -9.235915  |
| 263 | 5 | 0 | 8.474889  | -2.168323  | -9.073153  |
| 264 | 5 | 0 | 9.510271  | -1.072214  | -8.203729  |
| 265 | 5 | 0 | 9.854896  | 0.355458   | -6.327361  |
| 266 | 5 | 0 | 9.249195  | 1.228693   | -8.460296  |
| 267 | 5 | 0 | 8.022220  | 1.852047   | -9.526051  |
| 268 | 5 | 0 | 5.745073  | 2.445780   | -9.898081  |
| 269 | 5 | 0 | 6.638500  | 0.384225   | -10.691444 |
| 270 | 5 | 0 | 6.830595  | -1.334609  | -10.496314 |
| 271 | 5 | 0 | 11.574747 | -1.633273  | 0.471706   |
| 272 | 5 | 0 | 11.218634 | -2.960428  | 1.503906   |
| 273 | 5 | 0 | 12.454440 | -0.889103  | -1.613689  |
| 274 | 5 | 0 | 12.180735 | -0.218986  | -3.196711  |
| 275 | 5 | 0 | 10.656717 | 0.612254   | -4.829197  |
| 276 | 5 | 0 | 11.938503 | 2.083240   | -3.461167  |
| 277 | 5 | 0 | 12.029070 | 3.134065   | -2.076556  |
| 278 | 5 | 0 | 12.390696 | 2.236997   | 0.042041   |
| 279 | 5 | 0 | 12.573899 | 0.517422   | 0.239660   |
| 280 | 5 | 0 | 10.956827 | 4.125577   | -0.193884  |
| 281 | 5 | 0 | 10.299164 | 5.544151   | 0.519167   |
| 282 | 5 | 0 | 10.201228 | 6.976670   | 2.420612   |
| 283 | 5 | 0 | 9.311664  | 7.583257   | 3.788085   |



|     |   |   |            |           |            |
|-----|---|---|------------|-----------|------------|
| 284 | 5 | 0 | 7.752111   | 9.290393  | 3.502087   |
| 285 | 5 | 0 | 7.474024   | 9.957118  | 1.918548   |
| 286 | 5 | 0 | 8.662104   | 9.143512  | 0.087265   |
| 287 | 5 | 0 | 9.829091   | 7.869950  | 0.302058   |
| 288 | 5 | 0 | 6.391808   | 9.808343  | -0.199278  |
| 289 | 5 | 0 | 5.184268   | 10.424729 | -1.255490  |
| 290 | 5 | 0 | 3.442019   | 12.012601 | -1.604668  |
| 291 | 5 | 0 | 4.630085   | 11.203066 | -3.438205  |
| 292 | 5 | 0 | 3.816895   | 10.943215 | -4.955265  |
| 293 | 5 | 0 | 2.458397   | 9.553877  | -6.334802  |
| 294 | 5 | 0 | 2.365950   | 8.515344  | -7.700998  |
| 295 | 5 | 0 | 1.543098   | 11.409602 | -5.152898  |
| 296 | 5 | 0 | 0.656221   | 12.014611 | -3.782702  |
| 297 | 5 | 0 | 1.742679   | 12.359326 | -1.751306  |
| 298 | 5 | 0 | -0.508973  | 11.579778 | -1.750064  |
| 299 | 5 | 0 | -2.017819  | 11.509266 | -0.930376  |
| 300 | 5 | 0 | -4.064398  | 11.661620 | 2.478366   |
| 301 | 5 | 0 | -3.293421  | 12.121726 | 0.987108   |
| 302 | 5 | 0 | -4.382437  | 11.779588 | -1.044099  |
| 303 | 5 | 0 | -5.966780  | 11.059002 | -1.070307  |
| 304 | 5 | 0 | -6.185376  | 10.699404 | 2.443025   |
| 305 | 5 | 0 | -6.997245  | 10.440146 | 0.925397   |
| 306 | 5 | 0 | -7.319078  | 9.097485  | -1.016887  |
| 307 | 5 | 0 | -8.340186  | 8.015103  | -1.876752  |
| 308 | 5 | 0 | -10.406056 | 6.828836  | -1.944073  |
| 309 | 5 | 0 | -11.266414 | 5.319891  | -1.831816  |
| 310 | 5 | 0 | -9.379143  | 7.442628  | -3.943289  |
| 311 | 5 | 0 | -9.470535  | 6.389292  | -5.326090  |
| 312 | 5 | 0 | -10.619588 | 4.368149  | -5.175144  |
| 313 | 5 | 0 | -11.388194 | 3.911259  | -3.682079  |
| 314 | 5 | 0 | -11.218634 | 2.960428  | -1.503906  |
| 315 | 5 | 0 | -11.574747 | 1.633273  | -0.471706  |
| 316 | 5 | 0 | -8.646661  | 4.489995  | -6.505989  |
| 317 | 5 | 0 | -7.772284  | 3.890433  | -7.858663  |
| 318 | 5 | 0 | -6.552683  | 4.386376  | -9.844644  |
| 319 | 5 | 0 | -7.698359  | 2.364455  | -9.687743  |
| 320 | 5 | 0 | -7.030791  | 0.926915  | -10.407009 |
| 321 | 5 | 0 | -4.987458  | 1.023201  | -11.521519 |
| 322 | 5 | 0 | -4.129028  | 2.533066  | -11.634097 |
| 323 | 5 | 0 | -5.025372  | 4.458162  | -10.676155 |
| 324 | 5 | 0 | -2.665363  | 4.130112  | -10.640804 |
| 325 | 5 | 0 | -1.101730  | 4.842660  | -10.613812 |
| 326 | 5 | 0 | 0.196746   | 6.840395  | -10.584746 |
| 327 | 5 | 0 | 1.231482   | 7.937555  | -9.715389  |
| 328 | 5 | 0 | 3.507530   | 7.482840  | -9.519944  |
| 329 | 5 | 0 | 4.172765   | 6.044327  | -10.239602 |
| 330 | 5 | 0 | 2.788686   | 4.574659  | -11.401521 |
| 331 | 5 | 0 | 1.088456   | 4.915921  | -11.549501 |
| 332 | 5 | 0 | 4.592110   | 3.702126  | -10.111785 |
| 333 | 5 | 0 | 7.772283   | -3.890433 | 7.858663   |
| 334 | 5 | 0 | 8.646660   | -4.489996 | 6.505989   |
| 335 | 5 | 0 | 10.619587  | -4.368149 | 5.175144   |
| 336 | 5 | 0 | 11.388193  | -3.911259 | 3.682080   |
| 337 | 5 | 0 | 11.266414  | -5.319891 | 1.831816   |
| 338 | 5 | 0 | 10.406055  | -6.828836 | 1.944073   |
| 339 | 5 | 0 | 9.379142   | -7.442628 | 3.943289   |
| 340 | 5 | 0 | 9.470534   | -6.389292 | 5.326090   |
| 341 | 8 | 0 | 1.459386   | 12.849020 | -3.018384  |

|     |   |   |            |            |            |
|-----|---|---|------------|------------|------------|
| 342 | 8 | 0 | 8.656251   | 9.982600   | 1.192378   |
| 343 | 8 | 0 | -6.697915  | 11.463574  | 0.037506   |
| 344 | 8 | 0 | -10.555560 | 7.376123   | -3.210348  |
| 345 | 8 | 0 | -7.397265  | 3.475266   | -10.462991 |
| 346 | 8 | 0 | -4.963540  | 7.276631   | 9.906911   |
| 347 | 8 | 0 | 2.484596   | 7.989017   | -10.309306 |
| 348 | 8 | 0 | 6.206575   | 7.247534   | 9.208842   |
| 349 | 8 | 0 | 13.231412  | -0.025337  | -0.855027  |
| 350 | 8 | 0 | 9.776700   | 0.051862   | -8.972345  |
| 351 | 8 | 0 | 6.356234   | -1.243609  | 11.577596  |
| 352 | 8 | 0 | 10.555560  | -7.376123  | 3.210348   |
| 353 | 8 | 0 | 4.963541   | -7.276631  | -9.906911  |
| 354 | 8 | 0 | -0.880610  | -6.283586  | 11.656036  |
| 355 | 8 | 0 | 4.237205   | -12.580765 | -0.079479  |
| 356 | 8 | 0 | -1.459386  | -12.849020 | 3.018383   |
| 357 | 8 | 0 | -8.656251  | -9.982600  | -1.192379  |
| 358 | 8 | 0 | -3.834808  | -7.134166  | -10.498851 |
| 359 | 8 | 0 | -8.170216  | 1.654368   | 10.325635  |
| 360 | 8 | 0 | -12.950008 | -2.646422  | 1.160138   |

-----  
SCF Done: E(RB3LYP) = -18032.8749915

**Table S15:** Theoretical Cartesian coordinates for *t*-**B**<sub>90</sub>-2.

Standard orientation:

| Center<br>Number | Atomic<br>Number | Atomic<br>Type | Coordinates (Angstroms) |            |            |
|------------------|------------------|----------------|-------------------------|------------|------------|
|                  |                  |                | X                       | Y          | Z          |
| 1                | 5                | 0              | 2.970907                | 4.089103   | 9.815112   |
| 2                | 5                | 0              | 3.831480                | 5.273579   | 8.910253   |
| 3                | 5                | 0              | 8.075867                | -1.354610  | 7.545994   |
| 4                | 5                | 0              | 8.937328                | -0.168911  | 6.640201   |
| 5                | 5                | 0              | -2.970907               | -4.089103  | -9.815112  |
| 6                | 5                | 0              | -3.831480               | -5.273579  | -8.910253  |
| 7                | 5                | 0              | -8.075867               | 1.354610   | -7.545994  |
| 8                | 5                | 0              | -8.937328               | 0.168911   | -6.640201  |
| 9                | 5                | 0              | -4.807029               | 1.561898   | -9.815112  |
| 10               | 5                | 0              | -6.199464               | 2.014328   | -8.910253  |
| 11               | 5                | 0              | -7.131166               | -5.389882  | -6.640201  |
| 12               | 5                | 0              | -5.737294               | -5.842778  | -7.545994  |
| 13               | 5                | 0              | 7.131166                | 5.389882   | 6.640201   |
| 14               | 5                | 0              | 5.737294                | 5.842778   | 7.545994   |
| 15               | 5                | 0              | 4.807029                | -1.561898  | 9.815112   |
| 16               | 5                | 0              | 6.199464                | -2.014328  | 8.910253   |
| 17               | 5                | 0              | -2.814864               | -1.820398  | -10.618819 |
| 18               | 5                | 0              | -3.347276               | -0.181803  | -10.618819 |
| 19               | 5                | 0              | -9.170372               | -2.074775  | -5.786456  |
| 20               | 5                | 0              | -8.638509               | -3.711681  | -5.786456  |
| 21               | 5                | 0              | 8.638509                | 3.711681   | 5.786456   |
| 22               | 5                | 0              | 9.170372                | 2.074775   | 5.786456   |
| 23               | 5                | 0              | 3.347276                | 0.181803   | 10.618819  |
| 24               | 5                | 0              | 2.814864                | 1.820398   | 10.618819  |
| 25               | 5                | 0              | -7.131166               | -8.349604  | -1.851269  |
| 26               | 5                | 0              | -5.737294               | -9.362312  | -1.851269  |
| 27               | 5                | 0              | -6.199464               | -7.068738  | 5.786456   |
| 28               | 5                | 0              | -4.807029               | -8.080401  | 5.786456   |
| 29               | 5                | 0              | 6.199464                | 7.068738   | -5.786456  |
| 30               | 5                | 0              | 4.807029                | 8.080401   | -5.786456  |
| 31               | 5                | 0              | 7.131166                | 8.349604   | 1.851269   |
| 32               | 5                | 0              | 5.737294                | 9.362312   | 1.851269   |
| 33               | 5                | 0              | -3.831480               | -10.327989 | -0.732047  |
| 34               | 5                | 0              | -2.970907               | -10.607606 | 0.732047   |
| 35               | 5                | 0              | -8.937328               | -5.863637  | 3.120667   |
| 36               | 5                | 0              | -8.075867               | -6.143542  | 4.586271   |
| 37               | 5                | 0              | 8.075867                | 6.143542   | -4.586271  |
| 38               | 5                | 0              | 8.937328                | 5.863637   | -3.120667  |
| 39               | 5                | 0              | 2.970907                | 10.607606  | -0.732047  |
| 40               | 5                | 0              | 3.831480                | 10.327989  | 0.732047   |
| 41               | 5                | 0              | -2.814864               | -10.311867 | 3.120667   |
| 42               | 5                | 0              | -3.347276               | -9.579065  | 4.586271   |
| 43               | 5                | 0              | -8.638509               | -6.835478  | -0.732047  |
| 44               | 5                | 0              | -9.170372               | -6.103431  | 0.732047   |
| 45               | 5                | 0              | 3.347276                | 9.579065   | -4.586271  |
| 46               | 5                | 0              | 2.814864                | 10.311867  | -3.120667  |
| 47               | 5                | 0              | 9.170372                | 6.103431   | -0.732047  |
| 48               | 5                | 0              | 8.638509                | 6.835478   | 0.732047   |
| 49               | 5                | 0              | -10.144597              | 4.201973   | -1.851269  |
| 50               | 5                | 0              | -10.677009              | 2.563377   | -1.851269  |
| 51               | 5                | 0              | -9.170372               | 2.074775   | 5.786456   |

|     |   |   |            |           |            |
|-----|---|---|------------|-----------|------------|
| 52  | 5 | 0 | -8.638509  | 3.711681  | 5.786456   |
| 53  | 5 | 0 | 10.677009  | -2.563377 | 1.851269   |
| 54  | 5 | 0 | 10.144597  | -4.201973 | 1.851269   |
| 55  | 5 | 0 | 9.170372   | -2.074775 | -5.786456  |
| 56  | 5 | 0 | 8.638509   | -3.711681 | -5.786456  |
| 57  | 5 | 0 | -8.338436  | 5.782147  | 4.586271   |
| 58  | 5 | 0 | -8.338436  | 6.687940  | 3.120667   |
| 59  | 5 | 0 | -11.006494 | -0.452430 | 0.732047   |
| 60  | 5 | 0 | -11.006494 | 0.452430  | -0.732047  |
| 61  | 5 | 0 | 11.006494  | -0.452430 | 0.732047   |
| 62  | 5 | 0 | 11.006494  | 0.452430  | -0.732047  |
| 63  | 5 | 0 | 8.338436   | -5.782147 | -4.586271  |
| 64  | 5 | 0 | 8.338436   | -6.687940 | -3.120667  |
| 65  | 5 | 0 | -8.638509  | 6.835478  | 0.732047   |
| 66  | 5 | 0 | -9.170372  | 6.103431  | -0.732047  |
| 67  | 5 | 0 | -10.677009 | -0.509448 | 3.120667   |
| 68  | 5 | 0 | -10.144597 | 0.223354  | 4.586271   |
| 69  | 5 | 0 | 10.144597  | -0.223354 | -4.586271  |
| 70  | 5 | 0 | 10.677009  | 0.509448  | -3.120667  |
| 71  | 5 | 0 | 8.638509   | -6.835478 | -0.732047  |
| 72  | 5 | 0 | 9.170372   | -6.103431 | 0.732047   |
| 73  | 5 | 0 | 2.601142   | 8.552100  | -6.640201  |
| 74  | 5 | 0 | 1.207270   | 8.099204  | -7.545994  |
| 75  | 5 | 0 | 6.199464   | 2.014328  | -8.910253  |
| 76  | 5 | 0 | 4.807029   | 1.561898  | -9.815112  |
| 77  | 5 | 0 | -4.807029  | -1.561898 | 9.815112   |
| 78  | 5 | 0 | -6.199464  | -2.014328 | 8.910253   |
| 79  | 5 | 0 | -1.207270  | -8.099204 | 7.545994   |
| 80  | 5 | 0 | -2.601142  | -8.552100 | 6.640201   |
| 81  | 5 | 0 | 2.601142   | 2.114561  | -10.618819 |
| 82  | 5 | 0 | 1.207270   | 3.127268  | -10.618819 |
| 83  | 5 | 0 | -1.207270  | -3.127268 | 10.618819  |
| 84  | 5 | 0 | -2.601142  | -2.114561 | 10.618819  |
| 85  | 5 | 0 | 7.329734   | 3.650973  | -7.545994  |
| 86  | 5 | 0 | 7.329734   | 5.116577  | -6.640201  |
| 87  | 5 | 0 | 0.000000   | 5.054410  | -9.815112  |
| 88  | 5 | 0 | 0.000000   | 6.518503  | -8.910253  |
| 89  | 5 | 0 | -7.329734  | -5.116577 | 6.640201   |
| 90  | 5 | 0 | -7.329734  | -3.650973 | 7.545994   |
| 91  | 5 | 0 | 0.000000   | -6.518503 | 8.910253   |
| 92  | 5 | 0 | 0.000000   | -5.054410 | 9.815112   |
| 93  | 5 | 0 | -8.075867  | -1.354610 | 7.545994   |
| 94  | 5 | 0 | -8.937328  | -0.168911 | 6.640201   |
| 95  | 5 | 0 | -2.970907  | 4.089103  | 9.815112   |
| 96  | 5 | 0 | -3.831480  | 5.273579  | 8.910253   |
| 97  | 5 | 0 | 3.831480   | -5.273579 | -8.910253  |
| 98  | 5 | 0 | 2.970907   | -4.089103 | -9.815112  |
| 99  | 5 | 0 | 8.937328   | 0.168911  | -6.640201  |
| 100 | 5 | 0 | 8.075867   | 1.354610  | -7.545994  |
| 101 | 5 | 0 | -7.131166  | 5.389882  | 6.640201   |
| 102 | 5 | 0 | -5.737294  | 5.842778  | 7.545994   |
| 103 | 5 | 0 | 5.737294   | -5.842778 | -7.545994  |
| 104 | 5 | 0 | 7.131166   | -5.389882 | -6.640201  |
| 105 | 5 | 0 | -3.347276  | 0.181803  | 10.618819  |
| 106 | 5 | 0 | -2.814864  | 1.820398  | 10.618819  |
| 107 | 5 | 0 | 2.814864   | -1.820398 | -10.618819 |
| 108 | 5 | 0 | 3.347276   | -0.181803 | -10.618819 |
| 109 | 5 | 0 | -0.861461  | 3.239628  | 10.618819  |

|     |   |   |            |            |            |
|-----|---|---|------------|------------|------------|
| 110 | 5 | 0 | 0.861461   | 3.239628   | 10.618819  |
| 111 | 5 | 0 | 0.860572   | 9.362683   | 5.786456   |
| 112 | 5 | 0 | -0.860572  | 9.362683   | 5.786456   |
| 113 | 5 | 0 | 0.861461   | -3.239628  | -10.618819 |
| 114 | 5 | 0 | -0.861461  | -3.239628  | -10.618819 |
| 115 | 5 | 0 | -0.860572  | -9.362683  | -5.786456  |
| 116 | 5 | 0 | 0.860572   | -9.362683  | -5.786456  |
| 117 | 5 | 0 | 3.783891   | -7.262009  | -7.545994  |
| 118 | 5 | 0 | 2.922430   | -8.447707  | -6.640201  |
| 119 | 5 | 0 | -2.922430  | 8.447707   | 6.640201   |
| 120 | 5 | 0 | -3.783891  | 7.262009   | 7.545994   |
| 121 | 5 | 0 | 2.922430   | 8.447707   | 6.640201   |
| 122 | 5 | 0 | 3.783891   | 7.262009   | 7.545994   |
| 123 | 5 | 0 | -3.783891  | -7.262009  | -7.545994  |
| 124 | 5 | 0 | -2.922430  | -8.447707  | -6.640201  |
| 125 | 5 | 0 | -10.677009 | -2.563377  | 1.851269   |
| 126 | 5 | 0 | -10.144597 | -4.201973  | 1.851269   |
| 127 | 5 | 0 | 10.144597  | 4.201973   | -1.851269  |
| 128 | 5 | 0 | 10.677009  | 2.563377   | -1.851269  |
| 129 | 5 | 0 | -8.338436  | -5.782147  | -4.586271  |
| 130 | 5 | 0 | -8.338436  | -6.687940  | -3.120667  |
| 131 | 5 | 0 | 8.338436   | 6.687940   | 3.120667   |
| 132 | 5 | 0 | 8.338436   | 5.782147   | 4.586271   |
| 133 | 5 | 0 | -3.783891  | -9.997011  | -3.120667  |
| 134 | 5 | 0 | -2.922430  | -9.717106  | -4.586271  |
| 135 | 5 | 0 | 2.922430   | 9.717106   | 4.586271   |
| 136 | 5 | 0 | 3.783891   | 9.997011   | 3.120667   |
| 137 | 5 | 0 | 3.831480   | -10.327989 | -0.732047  |
| 138 | 5 | 0 | 2.970907   | -10.607606 | 0.732047   |
| 139 | 5 | 0 | 8.937328   | -5.863637  | 3.120667   |
| 140 | 5 | 0 | 8.075867   | -6.143542  | 4.586271   |
| 141 | 5 | 0 | -2.970907  | 10.607606  | -0.732047  |
| 142 | 5 | 0 | -3.831480  | 10.327989  | 0.732047   |
| 143 | 5 | 0 | -8.075867  | 6.143542   | -4.586271  |
| 144 | 5 | 0 | -8.937328  | 5.863637   | -3.120667  |
| 145 | 5 | 0 | 7.131166   | -8.349604  | -1.851269  |
| 146 | 5 | 0 | 5.737294   | -9.362312  | -1.851269  |
| 147 | 5 | 0 | -5.737294  | 9.362312   | 1.851269   |
| 148 | 5 | 0 | -7.131166  | 8.349604   | 1.851269   |
| 149 | 5 | 0 | 6.199464   | -7.068738  | 5.786456   |
| 150 | 5 | 0 | 4.807029   | -8.080401  | 5.786456   |
| 151 | 5 | 0 | -4.807029  | 8.080401   | -5.786456  |
| 152 | 5 | 0 | -6.199464  | 7.068738   | -5.786456  |
| 153 | 5 | 0 | 2.601142   | -2.114561  | 10.618819  |
| 154 | 5 | 0 | 1.207270   | -3.127268  | 10.618819  |
| 155 | 5 | 0 | -1.207270  | 3.127268   | -10.618819 |
| 156 | 5 | 0 | -2.601142  | 2.114561   | -10.618819 |
| 157 | 5 | 0 | 0.861461   | 10.946566  | -1.851269  |
| 158 | 5 | 0 | -0.861461  | 10.946566  | -1.851269  |
| 159 | 5 | 0 | 0.861461   | -10.946566 | 1.851269   |
| 160 | 5 | 0 | -0.861461  | -10.946566 | 1.851269   |
| 161 | 5 | 0 | -1.207270  | 8.099204   | -7.545994  |
| 162 | 5 | 0 | -2.601142  | 8.552100   | -6.640201  |
| 163 | 5 | 0 | 2.601142   | -8.552100  | 6.640201   |
| 164 | 5 | 0 | 1.207270   | -8.099204  | 7.545994   |
| 165 | 5 | 0 | -7.329734  | 3.650973   | -7.545994  |
| 166 | 5 | 0 | -7.329734  | 5.116577   | -6.640201  |
| 167 | 5 | 0 | 7.329734   | -5.116577  | 6.640201   |

|     |   |   |            |            |            |
|-----|---|---|------------|------------|------------|
| 168 | 5 | 0 | 7.329734   | -3.650973  | 7.545994   |
| 169 | 5 | 0 | -10.144597 | -0.223354  | -4.586271  |
| 170 | 5 | 0 | -10.677009 | 0.509448   | -3.120667  |
| 171 | 5 | 0 | 10.677009  | -0.509448  | 3.120667   |
| 172 | 5 | 0 | 10.144597  | 0.223354   | 4.586271   |
| 173 | 5 | 0 | -3.347276  | 9.579065   | -4.586271  |
| 174 | 5 | 0 | -2.814864  | 10.311867  | -3.120667  |
| 175 | 5 | 0 | 2.814864   | -10.311867 | 3.120667   |
| 176 | 5 | 0 | 3.347276   | -9.579065  | 4.586271   |
| 177 | 5 | 0 | -3.783891  | 9.997011   | 3.120667   |
| 178 | 5 | 0 | -2.922430  | 9.717106   | 4.586271   |
| 179 | 5 | 0 | 2.922430   | -9.717106  | -4.586271  |
| 180 | 5 | 0 | 3.783891   | -9.997011  | -3.120667  |
| 181 | 8 | 0 | -2.418805  | 9.447853   | -5.602609  |
| 182 | 8 | 0 | -4.566478  | 8.941121   | -4.727814  |
| 183 | 8 | 0 | 1.192287   | 7.069985   | -8.470086  |
| 184 | 8 | 0 | -1.192287  | 7.069985   | -8.470086  |
| 185 | 8 | 0 | 0.000000   | 8.661936   | -7.174443  |
| 186 | 8 | 0 | 3.829604   | 7.926901   | -6.756253  |
| 187 | 8 | 0 | 4.566478   | 8.941121   | -4.727814  |
| 188 | 8 | 0 | 2.418805   | 9.447853   | -5.602609  |
| 189 | 8 | 0 | 3.559112   | 10.327641  | -1.954774  |
| 190 | 8 | 0 | 1.629952   | 10.954463  | -0.701130  |
| 191 | 8 | 0 | 1.494903   | 10.719494  | -3.059327  |
| 192 | 8 | 0 | -1.494903  | 10.719494  | -3.059327  |
| 193 | 8 | 0 | -3.559112  | 10.327641  | -1.954774  |
| 194 | 8 | 0 | -1.629952  | 10.954463  | -0.701130  |
| 195 | 8 | 0 | -9.914631  | 4.935291   | -0.701130  |
| 196 | 8 | 0 | -8.722344  | 6.576333   | -1.954774  |
| 197 | 8 | 0 | -9.732894  | 4.734243   | -3.059327  |
| 198 | 8 | 0 | -6.355519  | 6.091717   | -6.756253  |
| 199 | 8 | 0 | -7.092392  | 7.105937   | -4.727814  |
| 200 | 8 | 0 | -8.237990  | 5.219967   | -5.602609  |
| 201 | 8 | 0 | -7.757530  | 7.904285   | 0.701130   |
| 202 | 8 | 0 | -8.949817  | 6.263243   | 1.954774   |
| 203 | 8 | 0 | -7.510163  | 7.793570   | 3.059327   |
| 204 | 8 | 0 | -5.120213  | 9.820408   | 0.701130   |
| 205 | 8 | 0 | -3.191053  | 10.447231  | 1.954774   |
| 206 | 8 | 0 | -5.091358  | 9.550935   | 3.059327   |
| 207 | 8 | 0 | 1.192287   | 4.414081   | -10.111524 |
| 208 | 8 | 0 | 0.000000   | 2.543282   | -10.955979 |
| 209 | 8 | 0 | -1.192287  | 4.414081   | -10.111524 |
| 210 | 8 | 0 | -3.829604  | 2.497958   | -10.111524 |
| 211 | 8 | 0 | -4.566478  | 0.230094   | -10.111524 |
| 212 | 8 | 0 | -2.418805  | 0.785917   | -10.955979 |
| 213 | 8 | 0 | -6.355519  | 3.318678   | -8.470086  |
| 214 | 8 | 0 | -7.092392  | 1.050813   | -8.470086  |
| 215 | 8 | 0 | -8.237990  | 2.676685   | -7.174443  |
| 216 | 8 | 0 | -1.561101  | 8.663983   | 6.756253   |
| 217 | 8 | 0 | -1.561101  | 9.917627   | 4.727814   |
| 218 | 8 | 0 | -3.596455  | 9.065211   | 5.602609   |
| 219 | 8 | 0 | 1.561101   | 8.663983   | 6.756253   |
| 220 | 8 | 0 | 1.561101   | 9.917627   | 4.727814   |
| 221 | 8 | 0 | 3.596455   | 9.065211   | 5.602609   |
| 222 | 8 | 0 | 5.091358   | 9.550935   | 3.059327   |
| 223 | 8 | 0 | 3.191053   | 10.447231  | 1.954774   |
| 224 | 8 | 0 | 5.120213   | 9.820408   | 0.701130   |
| 225 | 8 | 0 | -1.494903  | -2.057558  | -10.955979 |

|     |   |   |            |            |            |
|-----|---|---|------------|------------|------------|
| 226 | 8 | 0 | -3.559112  | -2.870258  | -10.111524 |
| 227 | 8 | 0 | -1.629952  | -4.271875  | -10.111524 |
| 228 | 8 | 0 | -5.120213  | -5.018930  | -8.470086  |
| 229 | 8 | 0 | -3.191053  | -6.420547  | -8.470086  |
| 230 | 8 | 0 | -5.091358  | -7.007653  | -7.174443  |
| 231 | 8 | 0 | -7.757530  | -4.162013  | -6.756253  |
| 232 | 8 | 0 | -8.949817  | -4.549411  | -4.727814  |
| 233 | 8 | 0 | -7.510163  | -6.221736  | -5.602609  |
| 234 | 8 | 0 | -9.914631  | -1.580020  | -4.727814  |
| 235 | 8 | 0 | -8.722344  | -1.192623  | -6.756253  |
| 236 | 8 | 0 | -9.732894  | 0.619127   | -5.602609  |
| 237 | 8 | 0 | 9.732894   | -4.734243  | 3.059327   |
| 238 | 8 | 0 | 9.914631   | -4.935291  | 0.701130   |
| 239 | 8 | 0 | 8.722344   | -6.576333  | 1.954774   |
| 240 | 8 | 0 | 8.949817   | -4.549411  | -4.727814  |
| 241 | 8 | 0 | 7.757530   | -4.162013  | -6.756253  |
| 242 | 8 | 0 | 7.510163   | -6.221736  | -5.602609  |
| 243 | 8 | 0 | 5.120213   | -9.820408  | -0.701130  |
| 244 | 8 | 0 | 5.091358   | -9.550935  | -3.059327  |
| 245 | 8 | 0 | 3.191053   | -10.447231 | -1.954774  |
| 246 | 8 | 0 | -9.732894  | -4.734243  | 3.059327   |
| 247 | 8 | 0 | -8.722344  | -6.576333  | 1.954774   |
| 248 | 8 | 0 | -9.914631  | -4.935291  | 0.701130   |
| 249 | 8 | 0 | -3.829604  | -7.926901  | 6.756253   |
| 250 | 8 | 0 | -2.418805  | -9.447853  | 5.602609   |
| 251 | 8 | 0 | -4.566478  | -8.941121  | 4.727814   |
| 252 | 8 | 0 | -4.566478  | -0.230094  | 10.111524  |
| 253 | 8 | 0 | -2.418805  | -0.785917  | 10.955979  |
| 254 | 8 | 0 | -3.829604  | -2.497958  | 10.111524  |
| 255 | 8 | 0 | 2.418805   | -0.785917  | 10.955979  |
| 256 | 8 | 0 | 4.566478   | -0.230094  | 10.111524  |
| 257 | 8 | 0 | 3.829604   | -2.497958  | 10.111524  |
| 258 | 8 | 0 | 8.722344   | 1.192623   | 6.756253   |
| 259 | 8 | 0 | 9.914631   | 1.580020   | 4.727814   |
| 260 | 8 | 0 | 9.732894   | -0.619127  | 5.602609   |
| 261 | 8 | 0 | 7.092392   | -7.105937  | 4.727814   |
| 262 | 8 | 0 | 8.237990   | -5.219967  | 5.602609   |
| 263 | 8 | 0 | 6.355519   | -6.091717  | 6.756253   |
| 264 | 8 | 0 | -1.494903  | -10.719494 | 3.059327   |
| 265 | 8 | 0 | -1.629952  | -10.954463 | 0.701130   |
| 266 | 8 | 0 | -3.559112  | -10.327641 | 1.954774   |
| 267 | 8 | 0 | -7.510163  | -7.793570  | -3.059327  |
| 268 | 8 | 0 | -7.757530  | -7.904285  | -0.701130  |
| 269 | 8 | 0 | -8.949817  | -6.263243  | -1.954774  |
| 270 | 8 | 0 | -10.921996 | -1.834939  | 0.701130   |
| 271 | 8 | 0 | -10.656795 | -1.890768  | 3.059327   |
| 272 | 8 | 0 | -10.921996 | 0.193500   | 1.954774   |
| 273 | 8 | 0 | -10.921996 | -0.193500  | -1.954774  |
| 274 | 8 | 0 | -10.656795 | 1.890768   | -3.059327  |
| 275 | 8 | 0 | -10.921996 | 1.834939   | -0.701130  |
| 276 | 8 | 0 | -3.829604  | 7.926901   | -6.756253  |
| 277 | 8 | 0 | -8.237990  | -5.219967  | 5.602609   |
| 278 | 8 | 0 | -7.092392  | -7.105937  | 4.727814   |
| 279 | 8 | 0 | -6.355519  | -6.091717  | 6.756253   |
| 280 | 8 | 0 | 0.000000   | -8.661936  | 7.174443   |
| 281 | 8 | 0 | 1.192287   | -7.069985  | 8.470086   |
| 282 | 8 | 0 | -1.192287  | -7.069985  | 8.470086   |
| 283 | 8 | 0 | 6.355519   | -3.318678  | 8.470086   |

|     |   |   |           |            |            |
|-----|---|---|-----------|------------|------------|
| 284 | 8 | 0 | 7.092392  | -1.050813  | 8.470086   |
| 285 | 8 | 0 | 8.237990  | -2.676685  | 7.174443   |
| 286 | 8 | 0 | 7.757530  | 4.162013   | 6.756253   |
| 287 | 8 | 0 | 7.510163  | 6.221736   | 5.602609   |
| 288 | 8 | 0 | 8.949817  | 4.549411   | 4.727814   |
| 289 | 8 | 0 | 7.092392  | 7.105937   | -4.727814  |
| 290 | 8 | 0 | 6.355519  | 6.091717   | -6.756253  |
| 291 | 8 | 0 | 8.237990  | 5.219967   | -5.602609  |
| 292 | 8 | 0 | 9.732894  | 0.619127   | -5.602609  |
| 293 | 8 | 0 | 9.914631  | -1.580020  | -4.727814  |
| 294 | 8 | 0 | 8.722344  | -1.192623  | -6.756253  |
| 295 | 8 | 0 | -1.561101 | -9.917627  | -4.727814  |
| 296 | 8 | 0 | -3.596455 | -9.065211  | -5.602609  |
| 297 | 8 | 0 | -1.561101 | -8.663983  | -6.756253  |
| 298 | 8 | 0 | -8.237990 | -2.676685  | 7.174443   |
| 299 | 8 | 0 | -7.092392 | -1.050813  | 8.470086   |
| 300 | 8 | 0 | -6.355519 | -3.318678  | 8.470086   |
| 301 | 8 | 0 | -7.757530 | 4.162013   | 6.756253   |
| 302 | 8 | 0 | -8.949817 | 4.549411   | 4.727814   |
| 303 | 8 | 0 | -7.510163 | 6.221736   | 5.602609   |
| 304 | 8 | 0 | -3.559112 | 2.870258   | 10.111524  |
| 305 | 8 | 0 | -1.629952 | 4.271875   | 10.111524  |
| 306 | 8 | 0 | -1.494903 | 2.057558   | 10.955979  |
| 307 | 8 | 0 | 4.566478  | -8.941121  | 4.727814   |
| 308 | 8 | 0 | 3.829604  | -7.926901  | 6.756253   |
| 309 | 8 | 0 | 2.418805  | -9.447853  | 5.602609   |
| 310 | 8 | 0 | 8.949817  | -6.263243  | -1.954774  |
| 311 | 8 | 0 | 7.757530  | -7.904285  | -0.701130  |
| 312 | 8 | 0 | 7.510163  | -7.793570  | -3.059327  |
| 313 | 8 | 0 | 4.566478  | 0.230094   | -10.111524 |
| 314 | 8 | 0 | 3.829604  | 2.497958   | -10.111524 |
| 315 | 8 | 0 | 2.418805  | 0.785917   | -10.955979 |
| 316 | 8 | 0 | -3.191053 | -10.447231 | -1.954774  |
| 317 | 8 | 0 | -5.091358 | -9.550935  | -3.059327  |
| 318 | 8 | 0 | -5.120213 | -9.820408  | -0.701130  |
| 319 | 8 | 0 | -9.732894 | -0.619127  | 5.602609   |
| 320 | 8 | 0 | -9.914631 | 1.580020   | 4.727814   |
| 321 | 8 | 0 | -8.722344 | 1.192623   | 6.756253   |
| 322 | 8 | 0 | -5.120213 | 5.018930   | 8.470086   |
| 323 | 8 | 0 | -5.091358 | 7.007653   | 7.174443   |
| 324 | 8 | 0 | -3.191053 | 6.420547   | 8.470086   |
| 325 | 8 | 0 | 7.510163  | 7.793570   | 3.059327   |
| 326 | 8 | 0 | 8.949817  | 6.263243   | 1.954774   |
| 327 | 8 | 0 | 7.757530  | 7.904285   | 0.701130   |
| 328 | 8 | 0 | 1.561101  | -9.917627  | -4.727814  |
| 329 | 8 | 0 | 1.561101  | -8.663983  | -6.756253  |
| 330 | 8 | 0 | 3.596455  | -9.065211  | -5.602609  |
| 331 | 8 | 0 | 1.629952  | 4.271875   | 10.111524  |
| 332 | 8 | 0 | 3.559112  | 2.870258   | 10.111524  |
| 333 | 8 | 0 | 1.629952  | -4.271875  | -10.111524 |
| 334 | 8 | 0 | 3.559112  | -2.870258  | -10.111524 |
| 335 | 8 | 0 | 1.494903  | -2.057558  | -10.955979 |
| 336 | 8 | 0 | 7.092392  | 1.050813   | -8.470086  |
| 337 | 8 | 0 | 8.237990  | 2.676685   | -7.174443  |
| 338 | 8 | 0 | 6.355519  | 3.318678   | -8.470086  |
| 339 | 8 | 0 | 10.921996 | -1.834939  | 0.701130   |
| 340 | 8 | 0 | 10.921996 | 0.193500   | 1.954774   |
| 341 | 8 | 0 | 10.656795 | -1.890768  | 3.059327   |



|     |   |   |           |            |           |
|-----|---|---|-----------|------------|-----------|
| 342 | 8 | 0 | 9.732894  | 4.734243   | -3.059327 |
| 343 | 8 | 0 | 9.914631  | 4.935291   | -0.701130 |
| 344 | 8 | 0 | 8.722344  | 6.576333   | -1.954774 |
| 345 | 8 | 0 | -1.192287 | -4.414081  | 10.111524 |
| 346 | 8 | 0 | 0.000000  | -2.543282  | 10.955979 |
| 347 | 8 | 0 | 1.192287  | -4.414081  | 10.111524 |
| 348 | 8 | 0 | 1.494903  | 2.057558   | 10.955979 |
| 349 | 8 | 0 | 5.091358  | 7.007653   | 7.174443  |
| 350 | 8 | 0 | 5.120213  | 5.018930   | 8.470086  |
| 351 | 8 | 0 | 3.191053  | 6.420547   | 8.470086  |
| 352 | 8 | 0 | 10.921996 | 1.834939   | -0.701130 |
| 353 | 8 | 0 | 10.921996 | -0.193500  | -1.954774 |
| 354 | 8 | 0 | 10.656795 | 1.890768   | -3.059327 |
| 355 | 8 | 0 | 5.120213  | -5.018930  | -8.470086 |
| 356 | 8 | 0 | 5.091358  | -7.007653  | -7.174443 |
| 357 | 8 | 0 | 3.191053  | -6.420547  | -8.470086 |
| 358 | 8 | 0 | 3.559112  | -10.327641 | 1.954774  |
| 359 | 8 | 0 | 1.629952  | -10.954463 | 0.701130  |
| 360 | 8 | 0 | 1.494903  | -10.719494 | 3.059327  |

-----  
SCF Done: E(RB3LYP) = -18034.4571301

- 
- [1] Becke, A. D. *J. Chem. Phys.*, **1993**, *98*, 5648.  
[2] Lee, C.; Yang, W.; Parr, R. G. *Phys. Rev. B*, **1988**, *37*, 785.  
[3] Dunning, T. H. *J. Chem. Phys.*, **1970**, *53*, 2823.  
[4] Dunning, T. H.; Hay, P. J. *Methods of Electronic Structure Theory*; Schaefer, H. F., Ed.; Plenum: New York, **1977**; pp 1–27.  
[5] Huzinaga, S. *J. Chem. Phys.*, **1965**, *42*, 1293.  
[6] Gaussian 09, Revision B.01, M. J. Frisch, G. W. Trucks, H. B. Schlegel, G. E. Scuseria, M. A. Robb, J. R. Cheeseman, G. Scalmani, V. Barone, B. Mennucci, G. A. Petersson, H. Nakatsuji, M. Caricato, X. Li, H. P. Hratchian, A. F. Izmaylov, J. Bloino, G. Zheng, J. L. Sonnenberg, M. Hada, M. Ehara, K. Toyota, R. Fukuda, J. Hasegawa, M. Ishida, T. Nakajima, Y. Honda, O. Kitao, H. Nakai, T. Vreven, J. A. Montgomery, Jr., J. E. Peralta, F. Ogliaro, M. Bearpark, J. J. Heyd, E. Brothers, K. N. Kudin, V. N. Staroverov, T. Keith, R. Kobayashi, J. Normand, K. Raghavachari, A. Rendell, J. C. Burant, S. S. Iyengar, J. Tomasi, M. Cossi, N. Rega, J. M. Millam, M. Klene, J. E. Knox, J. B. Cross, V. Bakken, C. Adamo, J. Jaramillo, R. Gomperts, R. E. Stratmann, O. Yazyev, A. J. Austin, R. Cammi, C. Pomelli, J. W. Ochterski, R. L. Martin, K. Morokuma, V. G. Zakrzewski, G. A. Voth, P. Salvador, J. J. Dannenberg, S. Dapprich, A. D. Daniels, O. Farkas, J. B. Foresman, J. V. Ortiz, J. Cioslowski and D. J. Fox, Gaussian, Inc., Wallingford CT, 2010.  
[7] Papas, B. N.; Schaefer III, H. F. *J. Mol. Struct.*, **2006**, *768*, 175.  
[8] Fasolino, J. H. Los, M. I. Katsnelson, *Nat. Mat.* **2007**, *6*, 858.  
[9] P. Y. Huang, C. S. Ruiz-Vargas, A. M. van der Zande, W. S. Whitney, M. P. Levendorf, J. W. Kevek, S. Garg, J. S. Alden, C. J. Hustedt, Y. Zhu, J. Park, P. L. Mceuen, D. A. Muller, *Nature* **2011**, *469*, 389.  
[10] Z. Zhang, L. Pu, Q-S. Li, R. B. King, *Inorg. Chem.* **2015**, *54*, 10281.
